# Supplementary material for: Masculinity, femininity, and leadership: Taking a closer look at the alpha female
Source: PubMed Central journal article supplement (PMC6461231; doi:10.1371/journal.pone.0215181), 2019-04-12
Supplement: pone.0215181.s010.pdf [file pone.0215181.s010.pdf]

S8 DATA N=398

| AGE CAT | EDU CAT | EMP CAT | INCOME CAT | MGMT STATUS | SELF A NA | LEADERSHIP | STRENGTH | LOW INTROV | COLLAB | SDO Sum |
|---------|---------|---------|------------|-------------|-----------|------------|----------|------------|--------|---------|
| 3       | 3       | 3       | 7          | 0           | 2         | 20         | 19       | 14         | 19     | 21      |
| 4       | 3       | 2       | 7          | 4           | 1         | 27         | 18       | 18         | 19     | 25      |
| 3       | 3       | 3       | 2          | 3           | 2         | 21         | 15       | 17         | 15     | 26      |
| 5       | 6       | 3       | 7          | 3           | 2         | 26         | 16       | 18         | 20     | 40      |
| 6       | 3       | 4       | 3          | 4           | 1         | 18         | 16       | 13         | 19     | 22      |
| 4       | 3       | 3       | 3          | 2           | 1         | 21         | 16       | 14         | 16     | 28      |
| 6       | 1       | 4       | 3          | 0           | 1         | 17         | 17       | 14         | 20     | 16      |
| 3       | 4       | 3       | 3          | 3           | 1         | 14         | 20       | 13         | 16     | 21      |
| 4       | 3       | 4       | 3          | 0           | 2         | 19         | 20       | 14         | 18     | 24      |
| 4       | 5       | 3       | 7          | 4           | 1         | 25         | 14       | 15         | 15     | 35      |
| 4       | 2       | 4       | 3          | 4           | 1         | 23         | 16       | 16         | 19     | 26      |
| 6       | 2       | 4       | 3          | 4           | 1         | 24         | 16       | 18         | 20     | 22      |
| 2       | 4       | 2       | 2          | 3           | 1         | 16         | 14       | 14         | 20     | 25      |
| 6       | 2       | 4       | 7          | 4           | 1         | 13         | 12       | 16         | 16     | 29      |
| 3       | 3       | 4       | 5          | 4           | 2         | 24         | 16       | 17         | 13     | 31      |
| 2       | 5       | 3       | 6          | 2           | 1         | 24         | 18       | 15         | 16     | 25      |
| 3       | 3       | 3       | 5          | 1           | 2         | 21         | 19       | 16         | 19     | 22      |
| 3       | 3       | 3       | 7          | 3           | 1         | 20         | 17       | 15         | 18     | 40      |
| 2       | 2       | 3       | 3          | 2           | 1         | 18         | 20       | 16         | 18     | 22      |
| 3       | 6       | 4       | 2          | 4           | 1         | 24         | 15       | 15         | 15     | 32      |
| 3       | 3       | 4       | 4          | 2           | 1         | 23         | 19       | 16         | 13     | 23      |
| 2       | 3       | 3       | 2          | 1           | 1         | 18         | 19       | 14         | 19     | 24      |
| 4       | 3       | 3       | 3          | 4           | 2         | 26         | 14       | 18         | 15     | 41      |
| 3       | 4       | 3       | 7          | 3           | 1         | 24         | 13       | 15         | 17     | 43      |
| 4       | 4       | 3       | 4          | 2           | 1         | 18         | 15       | 16         | 16     | 21      |
| 3       | 6       | 3       | 4          | 3           | 2         | 22         | 17       | 17         | 18     | 27      |
| 3       | 3       | 4       | 3          | 0           | 1         | 18         | 16       | 6          | 12     | 27      |
| 4       | 4       | 4       | 2          | 0           | 2         | 23         | 19       | 14         | 20     | 21      |
| 4       | 2       | 3       | 3          | 3           | 1         | 14         | 16       | 16         | 18     | 34      |
| 4       | 4       | 4       | 1          | 1           | 1         | 17         | 17       | 11         | 17     | 20      |
| 4       | 6       | 4       | 1          | 0           | 2         | 22         | 20       | 14         | 18     | 27      |
| 4       | 4       | 3       | 7          | 4           | 1         | 20         | 17       | 17         | 17     | 36      |
| 3       | 2       | 3       | 4          | 3           | 1         | 20         | 14       | 15         | 14     | 31      |
| 3       | 3       | 4       | 6          | 4           | 2         | 25         | 18       | 18         | 13     | 36      |
| 4       | 4       | 4       | 7          | 4           | 2         | 16         | 17       | 18         | 13     | 40      |
| 5       | 3       | 3       | 4          | 3           | 2         | 23         | 20       | 14         | 17     | 28      |
| 2       | 4       | 2       | 2          | 2           | 1         | 24         | 15       | 11         | 17     | 27      |
| 3       | 4       | 4       | 2          | 0           | 2         | 23         | 17       | 15         | 11     | 26      |
| 4       | 2       | 4       | 3          | 4           | 2         | 22         | 13       | 19         | 15     | 29      |
| 2       | 4       | 1       | 1          | 0           | 1         | 18         | 18       | 9          | 20     | 26      |
| 3       | 4       | 4       | 4          | 4           | 1         | 22         | 20       | 16         | 14     | 32      |
| 5       | 5       | 3       | 3          | 0           | 1         | 16         | 14       | 9          | 14     | 27      |
| 3       | 5       | 3       | 3          | 0           | 2         | 20         | 16       | 13         | 15     | 29      |
| 4       | 4       | 3       | 7          | 4           | 1         | 23         | 19       | 18         | 15     | 40      |
| 4       | 3       | 3       | 7          | 4           | 1         | 24         | 17       | 16         | 12     | 38      |
| 4       | 5       | 3       | 5          | 2           | 1         | 18         | 18       | 13         | 17     | 32      |

|   |   |   |   |   |   |    |    |    |    |    |
|---|---|---|---|---|---|----|----|----|----|----|
| 4 | 3 | 3 | 4 | 4 | 1 | 24 | 16 | 14 | 14 | 31 |
| 4 | 3 | 3 | 6 | 4 | 1 | 22 | 20 | 17 | 12 | 37 |
| 5 | 2 | 4 | 7 | 4 | 2 | 22 | 18 | 19 | 20 | 33 |
| 3 | 3 | 3 | 3 | 1 | 1 | 18 | 16 | 14 | 16 | 28 |
| 5 | 3 | 3 | 7 | 3 | 2 | 26 | 16 | 14 | 16 | 31 |
| 5 | 4 | 3 | 5 | 4 | 1 | 22 | 17 | 15 | 18 | 34 |
| 4 | 3 | 3 | 4 | 3 | 1 | 19 | 12 | 15 | 18 | 29 |
| 2 | 4 | 3 | 4 | 1 | 1 | 19 | 13 | 14 | 14 | 26 |
| 4 | 5 | 3 | 3 | 4 | 1 | 23 | 18 | 19 | 16 | 36 |
| 4 | 2 | 4 | 4 | 4 | 1 | 22 | 17 | 18 | 15 | 30 |
| 4 | 3 | 4 | 1 | 4 | 1 | 20 | 16 | 17 | 14 | 36 |
| 5 | 3 | 4 | 5 | 4 | 1 | 21 | 17 | 15 | 13 | 36 |
| 4 | 4 | 2 | 3 | 1 | 1 | 21 | 16 | 14 | 19 | 29 |
| 2 | 3 | 3 | 3 | 1 | 1 | 20 | 16 | 13 | 16 | 29 |
| 6 | 2 | 2 | 2 | 1 | 1 | 12 | 17 | 8  | 16 | 23 |
| 5 | 4 | 3 | 7 | 4 | 1 | 16 | 15 | 14 | 15 | 36 |
| 3 | 2 | 4 | 3 | 4 | 1 | 18 | 15 | 15 | 14 | 29 |
| 5 | 3 | 3 | 4 | 1 | 1 | 16 | 16 | 12 | 12 | 25 |
| 5 | 3 | 4 | 4 | 1 | 1 | 17 | 17 | 15 | 18 | 28 |
| 2 | 3 | 3 | 3 | 2 | 1 | 19 | 19 | 16 | 18 | 29 |
| 2 | 5 | 3 | 3 | 2 | 1 | 18 | 14 | 14 | 14 | 39 |
| 5 | 4 | 4 | 5 | 0 | 1 | 23 | 17 | 15 | 20 | 37 |
| 5 | 1 | 4 | 4 | 4 | 2 | 19 | 18 | 17 | 17 | 28 |
| 4 | 5 | 3 | 3 | 3 | 2 | 26 | 16 | 17 | 15 | 37 |
| 3 | 3 | 3 | 4 | 1 | 1 | 16 | 17 | 10 | 18 | 28 |
| 4 | 5 | 3 | 4 | 0 | 1 | 22 | 17 | 9  | 14 | 28 |
| 6 | 4 | 3 | 7 | 4 | 2 | 25 | 16 | 9  | 17 | 45 |
| 3 | 4 | 3 | 2 | 2 | 1 | 23 | 20 | 13 | 10 | 24 |
| 4 | 4 | 3 | 6 | 4 | 1 | 27 | 14 | 18 | 19 | 34 |
| 3 | 5 | 3 | 3 | 1 | 1 | 23 | 14 | 14 | 15 | 28 |
| 5 | 5 | 3 | 4 | 3 | 1 | 16 | 19 | 12 | 17 | 30 |
| 4 | 5 | 3 | 5 | 3 | 1 | 19 | 17 | 14 | 16 | 32 |
| 4 | 4 | 3 | 5 | 3 | 2 | 22 | 19 | 15 | 13 | 37 |
| 2 | 3 | 3 | 2 | 1 | 1 | 14 | 17 | 10 | 12 | 25 |
| 3 | 5 | 3 | 3 | 0 | 1 | 20 | 10 | 9  | 17 | 28 |
| 4 | 5 | 2 | 3 | 0 | 1 | 13 | 12 | 8  | 17 | 29 |
| 2 | 3 | 2 | 2 | 3 | 1 | 16 | 14 | 15 | 15 | 31 |
| 3 | 3 | 4 | 1 | 0 | 1 | 10 | 9  | 6  | 16 | 26 |
| 2 | 3 | 3 | 3 | 3 | 1 | 18 | 14 | 11 | 15 | 28 |
| 3 | 4 | 1 | 1 | 0 | 2 | 14 | 16 | 11 | 14 | 23 |
| 4 | 5 | 3 | 5 | 3 | 1 | 19 | 17 | 15 | 14 | 34 |
| 6 | 1 | 4 | 2 | 0 | 2 | 16 | 15 | 15 | 15 | 23 |
| 4 | 4 | 3 | 7 | 4 | 2 | 22 | 15 | 15 | 15 | 34 |
| 3 | 4 | 3 | 1 | 4 | 1 | 24 | 17 | 18 | 16 | 28 |
| 4 | 4 | 3 | 7 | 3 | 1 | 21 | 18 | 11 | 15 | 36 |
| 4 | 3 | 3 | 5 | 4 | 1 | 15 | 15 | 17 | 13 | 33 |
| 5 | 4 | 3 | 4 | 0 | 2 | 21 | 16 | 14 | 17 | 28 |
| 5 | 4 | 3 | 7 | 4 | 1 | 18 | 17 | 13 | 13 | 35 |
| 3 | 4 | 3 | 1 | 4 | 1 | 12 | 11 | 14 | 14 | 29 |

|   |   |   |   |   |   |    |    |    |    |    |
|---|---|---|---|---|---|----|----|----|----|----|
| 6 | 3 | 3 | 6 | 4 | 1 | 19 | 16 | 19 | 20 | 31 |
| 5 | 3 | 3 | 7 | 4 | 1 | 17 | 18 | 13 | 9  | 42 |
| 4 | 3 | 3 | 6 | 2 | 1 | 22 | 20 | 12 | 16 | 34 |
| 4 | 3 | 2 | 6 | 3 | 1 | 19 | 14 | 12 | 16 | 30 |
| 5 | 4 | 3 | 7 | 4 | 1 | 21 | 20 | 18 | 17 | 45 |
| 2 | 3 | 3 | 2 | 1 | 2 | 21 | 16 | 16 | 17 | 25 |
| 3 | 3 | 3 | 7 | 4 | 1 | 16 | 18 | 18 | 17 | 33 |
| 4 | 3 | 3 | 7 | 4 | 1 | 22 | 12 | 16 | 16 | 38 |
| 2 | 3 | 2 | 2 | 3 | 2 | 15 | 17 | 13 | 12 | 26 |
| 1 | 1 | 2 | 2 | 2 | 2 | 18 | 19 | 16 | 17 | 26 |
| 2 | 1 | 3 | 3 | 1 | 1 | 12 | 17 | 6  | 13 | 24 |
| 4 | 3 | 3 | 6 | 1 | 1 | 18 | 18 | 13 | 18 | 24 |
| 2 | 3 | 3 | 5 | 3 | 1 | 18 | 18 | 16 | 16 | 36 |
| 2 | 3 | 3 | 3 | 1 | 1 | 12 | 5  | 6  | 15 | 25 |
| 3 | 3 | 3 | 5 | 1 | 1 | 17 | 10 | 10 | 10 | 32 |
| 2 | 3 | 3 | 2 | 1 | 2 | 13 | 13 | 15 | 16 | 36 |
| 6 | 2 | 4 | 4 | 4 | 2 | 23 | 14 | 14 | 18 | 35 |
| 4 | 4 | 3 | 4 | 3 | 1 | 23 | 16 | 11 | 16 | 22 |
| 2 | 2 | 1 | 1 | 0 | 2 | 18 | 17 | 13 | 17 | 16 |
| 5 | 1 | 4 | 2 | 0 | 1 | 17 | 16 | 14 | 18 | 15 |
| 1 | 2 | 2 | 2 | 1 | 1 | 11 | 11 | 8  | 13 | 21 |
| 3 | 3 | 3 | 4 | 4 | 1 | 21 | 19 | 16 | 12 | 36 |
| 4 | 3 | 4 | 3 | 0 | 1 | 26 | 15 | 12 | 18 | 25 |
| 5 | 4 | 4 | 3 | 4 | 1 | 23 | 18 | 19 | 18 | 23 |
| 5 | 3 | 4 | 3 | 0 | 2 | 21 | 19 | 13 | 15 | 31 |
| 4 | 3 | 4 | 4 | 4 | 1 | 20 | 17 | 17 | 15 | 29 |
| 6 | 4 | 4 | 2 | 4 | 1 | 19 | 13 | 12 | 20 | 28 |
| 5 | 4 | 4 | 2 | 0 | 1 | 18 | 17 | 12 | 16 | 20 |
| 5 | 2 | 4 | 2 | 0 | 1 | 16 | 17 | 13 | 18 | 21 |
| 4 | 3 | 4 | 1 | 0 | 1 | 17 | 16 | 11 | 14 | 19 |
| 3 | 2 | 4 | 6 | 4 | 2 | 28 | 19 | 19 | 18 | 45 |
| 3 | 4 | 4 | 2 | 0 | 1 | 18 | 13 | 8  | 16 | 26 |
| 3 | 3 | 4 | 3 | 0 | 2 | 15 | 18 | 14 | 19 | 26 |
| 6 | 1 | 4 | 2 | 0 | 1 | 19 | 13 | 11 | 18 | 21 |
| 5 | 3 | 4 | 2 | 4 | 2 | 21 | 15 | 18 | 20 | 23 |
| 2 | 2 | 3 | 3 | 1 | 2 | 19 | 19 | 16 | 20 | 31 |
| 6 | 1 | 4 | 3 | 0 | 2 | 16 | 17 | 11 | 14 | 18 |
| 3 | 4 | 4 | 3 | 4 | 1 | 23 | 19 | 19 | 18 | 30 |
| 6 | 4 | 4 | 7 | 4 | 1 | 14 | 14 | 11 | 14 | 40 |
| 4 | 3 | 4 | 7 | 0 | 2 | 22 | 20 | 15 | 15 | 32 |
| 5 | 3 | 3 | 3 | 0 | 1 | 15 | 18 | 7  | 13 | 18 |
| 5 | 4 | 2 | 4 | 0 | 2 | 20 | 17 | 7  | 19 | 23 |
| 4 | 2 | 3 | 7 | 3 | 1 | 24 | 13 | 14 | 17 | 32 |
| 5 | 3 | 3 | 6 | 4 | 1 | 24 | 19 | 19 | 19 | 24 |
| 2 | 3 | 4 | 2 | 0 | 1 | 21 | 13 | 13 | 14 | 29 |
| 4 | 3 | 4 | 2 | 0 | 1 | 13 | 18 | 15 | 13 | 17 |
| 5 | 1 | 3 | 6 | 4 | 2 | 17 | 18 | 17 | 17 | 36 |
| 4 | 3 | 4 | 2 | 0 | 1 | 12 | 17 | 13 | 19 | 17 |
| 4 | 2 | 3 | 3 | 1 | 1 | 15 | 17 | 11 | 13 | 25 |

|   |   |   |   |   |   |    |    |    |    |    |
|---|---|---|---|---|---|----|----|----|----|----|
| 4 | 1 | 4 | 2 | 0 | 1 | 21 | 17 | 7  | 19 | 18 |
| 5 | 1 | 4 | 2 | 1 | 2 | 20 | 19 | 16 | 20 | 19 |
| 3 | 3 | 4 | 7 | 0 | 1 | 25 | 15 | 9  | 14 | 24 |
| 5 | 3 | 4 | 3 | 0 | 1 | 22 | 16 | 13 | 12 | 25 |
| 5 | 2 | 1 | 1 | 0 | 1 | 18 | 18 | 15 | 17 | 19 |
| 5 | 5 | 4 | 7 | 4 | 1 | 21 | 16 | 11 | 16 | 34 |
| 5 | 3 | 4 | 4 | 0 | 1 | 22 | 19 | 14 | 20 | 21 |
| 5 | 2 | 4 | 4 | 4 | 2 | 23 | 19 | 16 | 18 | 38 |
| 6 | 4 | 4 | 5 | 4 | 1 | 23 | 19 | 19 | 16 | 29 |
| 4 | 2 | 4 | 4 | 4 | 2 | 16 | 18 | 17 | 18 | 38 |
| 5 | 3 | 2 | 3 | 1 | 1 | 16 | 18 | 15 | 16 | 17 |
| 2 | 4 | 3 | 7 | 1 | 2 | 22 | 20 | 16 | 13 | 41 |
| 5 | 3 | 4 | 2 | 4 | 1 | 12 | 15 | 16 | 17 | 22 |
| 4 | 3 | 4 | 4 | 4 | 1 | 19 | 15 | 17 | 16 | 32 |
| 5 | 3 | 3 | 4 | 2 | 1 | 18 | 19 | 9  | 15 | 22 |
| 6 | 3 | 3 | 4 | 1 | 1 | 21 | 18 | 11 | 19 | 22 |
| 4 | 3 | 4 | 2 | 0 | 1 | 22 | 15 | 12 | 17 | 20 |
| 4 | 4 | 4 | 6 | 4 | 1 | 24 | 17 | 19 | 12 | 30 |
| 3 | 3 | 3 | 5 | 3 | 1 | 17 | 14 | 15 | 18 | 26 |
| 4 | 3 | 4 | 4 | 0 | 1 | 15 | 16 | 14 | 16 | 33 |
| 5 | 3 | 4 | 2 | 0 | 1 | 22 | 15 | 8  | 16 | 17 |
| 4 | 3 | 4 | 1 | 0 | 2 | 22 | 16 | 14 | 19 | 20 |
| 4 | 2 | 3 | 4 | 4 | 2 | 21 | 20 | 16 | 17 | 30 |
| 5 | 4 | 3 | 4 | 4 | 2 | 19 | 19 | 11 | 13 | 35 |
| 5 | 4 | 4 | 4 | 0 | 1 | 17 | 20 | 10 | 17 | 23 |
| 5 | 4 | 4 | 3 | 4 | 1 | 21 | 17 | 12 | 15 | 27 |
| 4 | 4 | 4 | 3 | 0 | 1 | 22 | 17 | 12 | 17 | 23 |
| 3 | 2 | 4 | 3 | 4 | 2 | 13 | 17 | 16 | 10 | 25 |
| 3 | 3 | 3 | 3 | 3 | 1 | 17 | 20 | 14 | 16 | 30 |
| 4 | 4 | 3 | 5 | 4 | 1 | 16 | 18 | 18 | 18 | 28 |
| 3 | 4 | 4 | 1 | 4 | 1 | 24 | 17 | 19 | 14 | 26 |
| 5 | 1 | 3 | 3 | 1 | 1 | 16 | 14 | 9  | 14 | 20 |
| 3 | 3 | 3 | 4 | 3 | 1 | 18 | 17 | 17 | 15 | 33 |
| 5 | 2 | 3 | 3 | 3 | 2 | 27 | 18 | 18 | 12 | 25 |
| 3 | 3 | 3 | 5 | 3 | 2 | 14 | 18 | 16 | 18 | 35 |
| 4 | 4 | 3 | 5 | 4 | 2 | 25 | 19 | 18 | 19 | 29 |
| 3 | 3 | 3 | 4 | 4 | 2 | 20 | 18 | 16 | 18 | 30 |
| 4 | 3 | 4 | 7 | 4 | 1 | 17 | 9  | 17 | 7  | 26 |
| 3 | 4 | 3 | 4 | 1 | 1 | 15 | 13 | 10 | 16 | 25 |
| 4 | 5 | 4 | 4 | 3 | 1 | 25 | 18 | 15 | 14 | 25 |
| 4 | 4 | 4 | 7 | 4 | 1 | 20 | 18 | 17 | 17 | 35 |
| 5 | 3 | 3 | 5 | 3 | 1 | 19 | 14 | 10 | 14 | 25 |
| 2 | 3 | 3 | 3 | 2 | 1 | 20 | 12 | 13 | 17 | 22 |
| 5 | 2 | 4 | 3 | 4 | 1 | 12 | 12 | 12 | 16 | 24 |
| 4 | 3 | 4 | 3 | 1 | 1 | 13 | 12 | 5  | 18 | 31 |
| 5 | 4 | 4 | 3 | 4 | 1 | 17 | 18 | 15 | 14 | 33 |
| 5 | 4 | 2 | 2 | 3 | 1 | 24 | 15 | 13 | 15 | 21 |
| 5 | 4 | 2 | 2 | 0 | 2 | 16 | 19 | 10 | 8  | 24 |
| 2 | 3 | 4 | 2 | 0 | 1 | 14 | 14 | 5  | 15 | 20 |

|   |   |   |   |   |   |    |    |    |    |    |
|---|---|---|---|---|---|----|----|----|----|----|
| 3 | 3 | 3 | 6 | 3 | 1 | 19 | 14 | 15 | 17 | 23 |
| 4 | 4 | 3 | 4 | 0 | 2 | 21 | 16 | 11 | 15 | 24 |
| 5 | 4 | 3 | 6 | 4 | 1 | 26 | 14 | 14 | 18 | 28 |
| 4 | 1 | 4 | 2 | 3 | 2 | 18 | 15 | 13 | 13 | 23 |
| 5 | 4 | 3 | 5 | 4 | 2 | 26 | 14 | 19 | 17 | 39 |
| 2 | 4 | 2 | 2 | 1 | 1 | 17 | 14 | 12 | 14 | 27 |
| 2 | 4 | 3 | 2 | 4 | 1 | 19 | 20 | 16 | 13 | 28 |
| 2 | 4 | 3 | 2 | 3 | 1 | 16 | 16 | 12 | 18 | 24 |
| 2 | 3 | 3 | 2 | 1 | 1 | 16 | 15 | 11 | 18 | 30 |
| 3 | 3 | 3 | 4 | 4 | 1 | 16 | 17 | 14 | 17 | 28 |
| 5 | 3 | 3 | 6 | 3 | 1 | 22 | 15 | 13 | 16 | 38 |
| 2 | 4 | 2 | 2 | 1 | 1 | 19 | 16 | 13 | 20 | 26 |
| 4 | 3 | 3 | 7 | 1 | 1 | 21 | 16 | 13 | 13 | 36 |
| 3 | 2 | 2 | 2 | 3 | 1 | 15 | 17 | 13 | 13 | 21 |
| 5 | 4 | 3 | 5 | 4 | 1 | 19 | 20 | 17 | 16 | 26 |
| 5 | 4 | 3 | 6 | 4 | 1 | 24 | 18 | 16 | 19 | 35 |
| 4 | 2 | 3 | 5 | 4 | 1 | 14 | 18 | 17 | 16 | 32 |
| 3 | 4 | 3 | 3 | 3 | 2 | 20 | 16 | 15 | 14 | 32 |
| 3 | 4 | 2 | 2 | 0 | 1 | 20 | 13 | 9  | 16 | 16 |
| 4 | 4 | 3 | 5 | 0 | 2 | 18 | 16 | 11 | 15 | 30 |
| 3 | 4 | 3 | 2 | 3 | 2 | 20 | 20 | 14 | 14 | 22 |
| 4 | 3 | 3 | 3 | 4 | 1 | 23 | 18 | 17 | 16 | 41 |
| 2 | 3 | 2 | 2 | 2 | 1 | 20 | 19 | 13 | 18 | 19 |
| 3 | 3 | 4 | 3 | 4 | 1 | 22 | 20 | 17 | 13 | 37 |
| 4 | 4 | 4 | 1 | 0 | 1 | 23 | 16 | 13 | 15 | 25 |
| 4 | 2 | 3 | 5 | 2 | 1 | 18 | 16 | 13 | 15 | 29 |
| 5 | 1 | 3 | 4 | 3 | 2 | 16 | 15 | 12 | 16 | 33 |
| 4 | 3 | 3 | 7 | 4 | 1 | 16 | 17 | 17 | 18 | 33 |
| 3 | 3 | 3 | 6 | 1 | 1 | 15 | 19 | 13 | 15 | 38 |
| 2 | 3 | 3 | 2 | 0 | 1 | 14 | 16 | 10 | 10 | 17 |
| 3 | 2 | 2 | 3 | 1 | 1 | 14 | 19 | 11 | 20 | 18 |
| 5 | 2 | 4 | 1 | 3 | 2 | 15 | 20 | 18 | 18 | 26 |
| 4 | 4 | 3 | 5 | 4 | 1 | 17 | 18 | 14 | 17 | 31 |
| 3 | 4 | 3 | 3 | 1 | 1 | 15 | 16 | 8  | 17 | 31 |
| 4 | 5 | 3 | 3 | 0 | 1 | 24 | 14 | 10 | 12 | 21 |
| 3 | 5 | 3 | 4 | 1 | 1 | 16 | 17 | 6  | 8  | 26 |
| 4 | 4 | 4 | 6 | 4 | 1 | 23 | 20 | 18 | 19 | 37 |
| 6 | 5 | 4 | 2 | 0 | 2 | 18 | 13 | 10 | 18 | 26 |
| 2 | 2 | 2 | 1 | 1 | 2 | 18 | 8  | 10 | 15 | 22 |
| 3 | 5 | 2 | 2 | 0 | 1 | 13 | 16 | 9  | 9  | 38 |
| 2 | 3 | 3 | 2 | 2 | 1 | 18 | 15 | 12 | 19 | 24 |
| 2 | 3 | 2 | 2 | 1 | 2 | 15 | 17 | 12 | 15 | 26 |
| 3 | 5 | 3 | 4 | 1 | 1 | 17 | 14 | 7  | 14 | 27 |
| 3 | 4 | 3 | 5 | 2 | 1 | 21 | 15 | 15 | 19 | 22 |
| 3 | 4 | 3 | 6 | 2 | 2 | 21 | 18 | 14 | 16 | 31 |
| 4 | 5 | 3 | 3 | 2 | 1 | 22 | 19 | 15 | 17 | 22 |
| 2 | 4 | 2 | 2 | 2 | 1 | 16 | 16 | 10 | 14 | 19 |
| 5 | 2 | 3 | 5 | 4 | 1 | 18 | 20 | 16 | 18 | 35 |
| 5 | 4 | 3 | 4 | 2 | 1 | 18 | 16 | 11 | 17 | 26 |

|   |   |   |   |   |   |    |    |    |    |    |
|---|---|---|---|---|---|----|----|----|----|----|
| 4 | 4 | 3 | 7 | 3 | 1 | 26 | 18 | 12 | 15 | 37 |
| 2 | 1 | 2 | 2 | 2 | 1 | 17 | 15 | 14 | 17 | 15 |
| 2 | 3 | 1 | 1 | 0 | 1 | 11 | 16 | 5  | 14 | 20 |
| 4 | 4 | 3 | 4 | 2 | 1 | 22 | 16 | 14 | 17 | 25 |
| 5 | 2 | 4 | 2 | 0 | 2 | 21 | 20 | 13 | 17 | 24 |
| 5 | 3 | 4 | 3 | 0 | 2 | 16 | 18 | 12 | 17 | 27 |
| 3 | 4 | 3 | 2 | 1 | 1 | 20 | 16 | 13 | 13 | 18 |
| 4 | 3 | 4 | 2 | 3 | 1 | 16 | 11 | 13 | 18 | 21 |
| 3 | 4 | 1 | 1 | 0 | 1 | 15 | 16 | 12 | 15 | 20 |
| 5 | 3 | 4 | 5 | 4 | 1 | 20 | 19 | 16 | 19 | 24 |
| 5 | 3 | 3 | 7 | 4 | 1 | 26 | 18 | 15 | 20 | 39 |
| 4 | 3 | 1 | 1 | 0 | 2 | 19 | 17 | 14 | 16 | 15 |
| 3 | 4 | 3 | 2 | 0 | 1 | 20 | 14 | 8  | 15 | 21 |
| 3 | 4 | 1 | 1 | 0 | 1 | 14 | 18 | 11 | 18 | 16 |
| 4 | 4 | 4 | 3 | 4 | 2 | 23 | 19 | 18 | 16 | 26 |
| 2 | 2 | 3 | 3 | 2 | 1 | 19 | 18 | 15 | 16 | 19 |
| 5 | 3 | 3 | 6 | 3 | 2 | 14 | 16 | 16 | 15 | 33 |
| 5 | 4 | 4 | 5 | 0 | 1 | 23 | 18 | 15 | 19 | 29 |
| 4 | 3 | 3 | 4 | 2 | 1 | 19 | 18 | 12 | 15 | 22 |
| 2 | 4 | 2 | 3 | 3 | 1 | 14 | 17 | 17 | 13 | 20 |
| 4 | 5 | 3 | 6 | 3 | 1 | 25 | 14 | 13 | 17 | 35 |
| 3 | 5 | 3 | 3 | 1 | 1 | 21 | 11 | 7  | 17 | 22 |
| 3 | 4 | 2 | 2 | 0 | 1 | 26 | 15 | 13 | 15 | 18 |
| 3 | 4 | 3 | 3 | 3 | 2 | 20 | 17 | 16 | 17 | 22 |
| 4 | 4 | 1 | 1 | 0 | 1 | 14 | 13 | 8  | 18 | 19 |
| 5 | 2 | 4 | 4 | 0 | 1 | 20 | 19 | 15 | 16 | 18 |
| 3 | 5 | 3 | 3 | 3 | 1 | 18 | 15 | 15 | 19 | 31 |
| 3 | 4 | 2 | 2 | 1 | 1 | 14 | 10 | 9  | 17 | 22 |
| 5 | 5 | 3 | 6 | 4 | 1 | 20 | 12 | 11 | 17 | 35 |
| 2 | 4 | 3 | 2 | 1 | 1 | 18 | 14 | 12 | 16 | 23 |
| 3 | 5 | 3 | 5 | 0 | 2 | 20 | 16 | 14 | 15 | 26 |
| 2 | 4 | 3 | 2 | 0 | 1 | 14 | 14 | 10 | 19 | 23 |
| 4 | 2 | 4 | 2 | 4 | 1 | 14 | 17 | 13 | 13 | 26 |
| 2 | 1 | 3 | 2 | 0 | 1 | 13 | 16 | 10 | 14 | 24 |
| 2 | 3 | 3 | 3 | 3 | 1 | 22 | 19 | 17 | 16 | 36 |
| 4 | 3 | 4 | 2 | 4 | 1 | 19 | 16 | 14 | 13 | 22 |
| 4 | 3 | 3 | 4 | 1 | 1 | 21 | 15 | 12 | 16 | 23 |
| 4 | 3 | 3 | 4 | 4 | 1 | 20 | 12 | 12 | 15 | 37 |
| 4 | 5 | 1 | 1 | 0 | 1 | 17 | 12 | 10 | 12 | 17 |
| 3 | 2 | 3 | 3 | 1 | 2 | 20 | 18 | 13 | 16 | 26 |
| 4 | 4 | 3 | 5 | 3 | 1 | 21 | 16 | 11 | 18 | 24 |
| 5 | 3 | 4 | 4 | 3 | 1 | 15 | 15 | 13 | 16 | 26 |
| 4 | 1 | 3 | 3 | 2 | 1 | 17 | 14 | 12 | 17 | 22 |
| 2 | 4 | 2 | 2 | 1 | 2 | 17 | 16 | 12 | 13 | 22 |
| 2 | 4 | 2 | 3 | 1 | 1 | 21 | 18 | 14 | 18 | 19 |
| 3 | 3 | 3 | 2 | 3 | 1 | 18 | 17 | 13 | 17 | 32 |
| 3 | 3 | 1 | 1 | 0 | 1 | 12 | 16 | 11 | 7  | 16 |
| 3 | 5 | 3 | 4 | 2 | 1 | 23 | 16 | 13 | 19 | 30 |
| 4 | 4 | 3 | 4 | 1 | 1 | 17 | 15 | 12 | 14 | 21 |

|   |   |   |   |   |   |    |    |    |    |    |
|---|---|---|---|---|---|----|----|----|----|----|
| 2 | 3 | 3 | 2 | 3 | 1 | 18 | 14 | 14 | 15 | 28 |
| 2 | 2 | 3 | 3 | 1 | 2 | 19 | 16 | 13 | 14 | 23 |
| 2 | 3 | 3 | 2 | 0 | 1 | 20 | 15 | 10 | 18 | 16 |
| 2 | 4 | 3 | 3 | 0 | 2 | 17 | 14 | 12 | 19 | 25 |
| 2 | 4 | 3 | 2 | 3 | 1 | 22 | 19 | 12 | 14 | 24 |
| 3 | 5 | 1 | 1 | 0 | 1 | 19 | 16 | 11 | 15 | 18 |
| 3 | 4 | 4 | 5 | 3 | 1 | 20 | 15 | 14 | 18 | 25 |
| 4 | 5 | 3 | 4 | 0 | 1 | 15 | 13 | 5  | 16 | 25 |
| 3 | 1 | 4 | 3 | 4 | 2 | 20 | 17 | 16 | 17 | 20 |
| 1 | 1 | 2 | 1 | 1 | 1 | 10 | 14 | 10 | 12 | 26 |
| 2 | 4 | 3 | 4 | 1 | 1 | 21 | 10 | 5  | 17 | 23 |
| 4 | 4 | 3 | 3 | 3 | 1 | 22 | 14 | 10 | 16 | 27 |
| 5 | 3 | 3 | 3 | 1 | 1 | 17 | 19 | 13 | 16 | 30 |
| 2 | 3 | 3 | 3 | 1 | 1 | 20 | 15 | 12 | 18 | 20 |
| 6 | 3 | 3 | 3 | 1 | 2 | 19 | 15 | 12 | 17 | 21 |
| 3 | 4 | 2 | 2 | 0 | 1 | 14 | 13 | 11 | 16 | 23 |
| 2 | 4 | 3 | 2 | 1 | 1 | 20 | 17 | 14 | 15 | 25 |
| 3 | 4 | 3 | 2 | 0 | 2 | 19 | 15 | 12 | 18 | 19 |
| 4 | 2 | 3 | 3 | 1 | 1 | 13 | 17 | 7  | 11 | 20 |
| 2 | 4 | 1 | 1 | 0 | 1 | 13 | 13 | 10 | 14 | 19 |
| 6 | 5 | 3 | 4 | 2 | 1 | 20 | 20 | 13 | 19 | 26 |
| 4 | 1 | 3 | 4 | 2 | 1 | 12 | 14 | 12 | 13 | 29 |
| 5 | 4 | 2 | 2 | 0 | 1 | 15 | 11 | 11 | 18 | 16 |
| 3 | 3 | 3 | 3 | 1 | 1 | 15 | 15 | 10 | 12 | 18 |
| 3 | 3 | 3 | 4 | 1 | 1 | 19 | 16 | 14 | 16 | 31 |
| 3 | 3 | 3 | 3 | 1 | 1 | 19 | 12 | 8  | 17 | 18 |
| 3 | 3 | 1 | 1 | 0 | 1 | 11 | 9  | 5  | 13 | 16 |
| 2 | 4 | 2 | 2 | 1 | 1 | 15 | 17 | 10 | 15 | 19 |
| 3 | 4 | 2 | 2 | 0 | 1 | 13 | 13 | 10 | 15 | 20 |
| 2 | 4 | 3 | 2 | 1 | 1 | 22 | 18 | 15 | 18 | 20 |
| 2 | 3 | 2 | 2 | 1 | 1 | 15 | 12 | 10 | 11 | 19 |
| 3 | 4 | 3 | 4 | 1 | 1 | 18 | 14 | 11 | 14 | 23 |
| 2 | 3 | 3 | 2 | 3 | 1 | 16 | 13 | 6  | 18 | 23 |
| 4 | 5 | 3 | 7 | 3 | 1 | 18 | 14 | 9  | 18 | 26 |
| 4 | 4 | 3 | 6 | 0 | 2 | 18 | 17 | 14 | 13 | 21 |
| 2 | 4 | 2 | 2 | 1 | 1 | 18 | 16 | 9  | 14 | 21 |
| 3 | 3 | 3 | 4 | 1 | 1 | 19 | 13 | 10 | 10 | 24 |
| 2 | 3 | 3 | 3 | 2 | 1 | 23 | 17 | 14 | 20 | 27 |
| 2 | 1 | 3 | 3 | 3 | 1 | 17 | 15 | 12 | 14 | 31 |
| 3 | 4 | 3 | 2 | 0 | 1 | 14 | 18 | 7  | 17 | 21 |
| 4 | 3 | 3 | 3 | 1 | 1 | 18 | 18 | 8  | 19 | 33 |
| 3 | 3 | 3 | 4 | 2 | 1 | 21 | 17 | 17 | 17 | 20 |
| 3 | 3 | 3 | 3 | 3 | 1 | 16 | 13 | 11 | 15 | 36 |
| 2 | 3 | 3 | 2 | 1 | 2 | 18 | 14 | 13 | 19 | 17 |
| 4 | 5 | 3 | 5 | 0 | 1 | 19 | 13 | 11 | 16 | 22 |
| 5 | 5 | 3 | 5 | 3 | 1 | 17 | 9  | 7  | 15 | 24 |
| 4 | 3 | 3 | 4 | 3 | 1 | 21 | 16 | 13 | 17 | 22 |
| 3 | 3 | 3 | 6 | 4 | 1 | 22 | 19 | 19 | 19 | 37 |
| 4 | 5 | 3 | 4 | 1 | 1 | 15 | 14 | 10 | 11 | 26 |

|   |   |   |   |   |   |    |    |    |    |    |
|---|---|---|---|---|---|----|----|----|----|----|
| 3 | 3 | 3 | 3 | 2 | 2 | 14 | 13 | 10 | 15 | 19 |
| 2 | 3 | 1 | 1 | 0 | 1 | 16 | 18 | 11 | 14 | 22 |
| 5 | 1 | 1 | 1 | 0 | 1 | 16 | 9  | 10 | 14 | 11 |
| 6 | 5 | 3 | 5 | 0 | 1 | 22 | 15 | 10 | 18 | 23 |
| 4 | 3 | 3 | 3 | 4 | 1 | 21 | 20 | 15 | 20 | 33 |
| 5 | 5 | 3 | 4 | 0 | 1 | 16 | 18 | 12 | 11 | 28 |
| 4 | 5 | 2 | 2 | 4 | 2 | 18 | 12 | 16 | 20 | 28 |
| 2 | 3 | 2 | 2 | 2 | 1 | 17 | 18 | 15 | 17 | 28 |
| 4 | 4 | 4 | 2 | 0 | 1 | 15 | 11 | 7  | 11 | 26 |
| 5 | 1 | 3 | 3 | 2 | 1 | 17 | 15 | 14 | 15 | 26 |
| 4 | 4 | 4 | 6 | 4 | 1 | 22 | 20 | 19 | 18 | 30 |
| 5 | 2 | 3 | 5 | 1 | 1 | 16 | 14 | 5  | 15 | 22 |
| 5 | 4 | 4 | 4 | 0 | 1 | 20 | 18 | 14 | 15 | 28 |
| 4 | 5 | 3 | 5 | 3 | 1 | 21 | 17 | 16 | 20 | 26 |
| 4 | 3 | 3 | 5 | 3 | 1 | 21 | 16 | 16 | 16 | 30 |
| 3 | 4 | 3 | 5 | 3 | 1 | 23 | 14 | 15 | 15 | 27 |
| 2 | 3 | 4 | 3 | 0 | 1 | 17 | 18 | 11 | 16 | 32 |
| 5 | 2 | 3 | 2 | 1 | 1 | 11 | 14 | 6  | 16 | 17 |
| 3 | 4 | 3 | 4 | 1 | 1 | 16 | 12 | 5  | 14 | 33 |
| 3 | 4 | 3 | 6 | 3 | 1 | 28 | 20 | 17 | 18 | 37 |
| 3 | 6 | 3 | 4 | 3 | 2 | 21 | 20 | 18 | 11 | 32 |
| 3 | 5 | 3 | 4 | 2 | 2 | 18 | 18 | 14 | 19 | 24 |
| 3 | 3 | 2 | 2 | 1 | 1 | 16 | 18 | 14 | 16 | 20 |
| 3 | 3 | 3 | 4 | 4 | 1 | 19 | 16 | 15 | 17 | 26 |
| 3 | 3 | 3 | 4 | 3 | 2 | 24 | 13 | 14 | 15 | 23 |
| 3 | 3 | 3 | 3 | 4 | 1 | 18 | 14 | 17 | 11 | 30 |
| 3 | 4 | 3 | 7 | 4 | 2 | 21 | 14 | 15 | 19 | 30 |
| 4 | 4 | 3 | 5 | 3 | 1 | 19 | 17 | 14 | 16 | 28 |
| 4 | 2 | 3 | 7 | 3 | 1 | 14 | 15 | 15 | 16 | 37 |
| 4 | 3 | 4 | 2 | 2 | 1 | 20 | 17 | 14 | 14 | 30 |
| 3 | 3 | 3 | 5 | 2 | 1 | 17 | 17 | 10 | 10 | 37 |
| 4 | 4 | 3 | 5 | 3 | 2 | 24 | 17 | 15 | 14 | 25 |
| 3 | 4 | 3 | 4 | 3 | 2 | 24 | 19 | 15 | 20 | 25 |
| 5 | 3 | 4 | 3 | 1 | 2 | 21 | 19 | 16 | 15 | 28 |
| 1 | 1 | 2 | 2 | 1 | 1 | 12 | 15 | 11 | 13 | 18 |
| 2 | 2 | 3 | 3 | 1 | 1 | 16 | 16 | 11 | 15 | 22 |
| 3 | 4 | 3 | 4 | 0 | 1 | 16 | 18 | 12 | 14 | 28 |
| 3 | 2 | 3 | 3 | 1 | 1 | 15 | 16 | 7  | 13 | 26 |
| 2 | 3 | 3 | 3 | 1 | 1 | 21 | 16 | 13 | 17 | 23 |
| 2 | 2 | 3 | 2 | 2 | 1 | 16 | 18 | 12 | 12 | 28 |
| 3 | 5 | 3 | 4 | 3 | 1 | 21 | 10 | 13 | 15 | 25 |
| 2 | 2 | 4 | 2 | 0 | 1 | 19 | 16 | 12 | 15 | 24 |
| 3 | 3 | 3 | 4 | 3 | 1 | 21 | 17 | 13 | 18 | 29 |
| 3 | 2 | 1 | 1 | 0 | 2 | 16 | 19 | 12 | 12 | 18 |
| 3 | 3 | 3 | 4 | 1 | 1 | 18 | 17 | 11 | 16 | 27 |
| 4 | 3 | 3 | 7 | 3 | 2 | 21 | 19 | 16 | 17 | 26 |
| 3 | 5 | 3 | 5 | 1 | 1 | 17 | 13 | 11 | 16 | 23 |
| 4 | 2 | 2 | 2 | 1 | 1 | 10 | 11 | 7  | 13 | 26 |
| 3 | 5 | 2 | 2 | 0 | 1 | 20 | 15 | 11 | 18 | 17 |

|   |   |   |   |   |   |    |    |    |    |    |
|---|---|---|---|---|---|----|----|----|----|----|
| 4 | 4 | 4 | 3 | 4 | 1 | 18 | 15 | 14 | 15 | 29 |
| 3 | 5 | 4 | 4 | 0 | 1 | 15 | 15 | 6  | 14 | 34 |
| 2 | 3 | 2 | 2 | 2 | 1 | 19 | 20 | 14 | 14 | 17 |
| 3 | 5 | 3 | 2 | 1 | 1 | 22 | 14 | 12 | 11 | 24 |
| 3 | 5 | 4 | 2 | 2 | 1 | 19 | 16 | 13 | 17 | 24 |
| 2 | 6 | 2 | 2 | 1 | 2 | 22 | 12 | 11 | 17 | 20 |
| 2 | 3 | 3 | 4 | 1 | 1 | 13 | 17 | 12 | 15 | 32 |
| 5 | 5 | 4 | 2 | 4 | 1 | 21 | 17 | 17 | 15 | 31 |
| 5 | 3 | 4 | 7 | 4 | 1 | 18 | 15 | 19 | 16 | 42 |

| RSES<br>Sum | BSRI-M<br>MEAN | BSRI-F<br>MEAN | BSRI-N<br>MEAN | SNI<br>SIZE | SNI<br>DIV | DOM<br>ROLE SEX | ENJOYS<br>SEX | INTIATES<br>SEX | LIFE<br>SAT | SEX<br>FREQ | SEX<br>PREF | SEX<br>EXP |
|-------------|----------------|----------------|----------------|-------------|------------|-----------------|---------------|-----------------|-------------|-------------|-------------|------------|
| 42          | 4              | 4.2            | 4              | 37          | 6          | 3               | 5             | 3               | 4           | 3           | 1           | 4          |
| 45          | 4              | 4.6            | 4.6            | 29          | 9          | 2               | 3             | 2               | 3           | 1           | 1           | 2          |
| 35          | 4              | 4.2            | 4.2            | 28          | 7          | 3               | 4             | 2               | 3           | 1           | 1           | 2          |
| 49          | 3.8            | 4.4            | 4              | 24          | 8          | 2               | 5             | 3               | 3           | 1           | 1           | 2          |
| 43          | 3.4            | 3.2            | 3.8            | 31          | 7          | 3               | 4             | 3               | 3           | 1           | 2           | 2          |
| 41          | 3.8            | 4.6            | 4.8            | 26          | 6          | 3               | 5             | 3               | 3           | 2           | 2           | 2          |
| 34          | 2.6            | 4.6            | 4.8            | 48          | 8          | 2               | 3             | 2               | 3           | 2           | 1           | 2          |
| 44          | 3              | 4.6            | 4.2            | 40          | 12         | 2               | 3             | 2               | 3           | 1           | 1           | 2          |
| 35          | 4.2            | 4.4            | 4              | 11          | 5          | 2               | 4             | 3               | 3           | 0           | 1           | 2          |
| 42          | 3.4            | 3.2            | 4.2            | 10          | 7          | 1               | 2             | 1               | 2           | 0           | 1           | 0          |
| 40          | 3.6            | 4.4            | 4.2            | 15          | 5          | 1               | 4             | 2               | 2           | 0           | 1           | 2          |
| 39          | 3.8            | 4.6            | 4.8            | 39          | 8          | 2               | 3             | 2               | 3           | 1           | 1           | 2          |
| 37          | 3.8            | 4              | 4.2            | 18          | 5          | 2               | 3             | 2               | 2           | 2           | 1           | 2          |
| 46          | 3.4            | 4.2            | 3.8            | 36          | 9          | 1               | 3             | 1               | 3           | 0           | 1           | 0          |
| 47          | 4.2            | 4.6            | 4.4            | 21          | 7          | 2               | 4             | 3               | 2           | 0           | 1           | 2          |
| 43          | 3.6            | 3.8            | 4.4            | 29          | 8          | 3               | 5             | 3               | 3           | 1           | 1           | 0          |
| 40          | 4.6            | 4.2            | 4.6            | 18          | 6          | 3               | 5             | 3               | 3           | 1           | 1           | 4          |
| 44          | 3.8            | 4.4            | 4.4            | 22          | 10         | 3               | 5             | 4               | 3           | 1           | 1           | 0          |
| 37          | 4.6            | 5              | 5              | 27          | 12         | 3               | 5             | 3               | 2           | 4           | 1           | 2          |
| 45          | 3.4            | 4.4            | 3.8            | 14          | 7          |                 |               |                 | 3           |             |             |            |
| 42          | 4.4            | 3              | 3.8            | 36          | 8          | 4               | 5             | 5               | 2           | 2           | 1           | 2          |
| 30          | 3.2            | 5              | 4.6            | 15          | 8          | 2               | 4             | 4               | 2           | 2           | 1           | 2          |
| 44          | 4.8            | 2.4            | 4.4            | 18          | 5          | 3               | 4             | 4               | 3           | 0           | 1           | 3          |
| 49          | 4.8            | 5              | 4.8            | 15          | 6          | 1               | 5             | 1               | 3           | 1           | 1           | 1          |
| 45          | 3.4            | 4.4            | 4.4            | 27          | 9          | 3               | 4             | 2               | 3           | 1           | 1           | 0          |
| 44          | 3.8            | 3.8            | 4              | 38          | 9          | 2               | 4             | 2               | 3           | 1           | 1           | 2          |
| 32          | 3.6            | 4.2            | 3.4            | 12          | 5          | 2               | 5             | 2               | 2           | 1           | 1           | 3          |
| 40          | 3.6            | 4.8            | 4.6            | 41          | 10         | 2               | 5             | 3               | 3           | 2           | 1           | 1          |
| 34          | 3.6            | 4.4            | 4.6            | 36          | 11         | 1               | 2             | 2               | 2           | 1           | 1           | 1          |
| 39          | 3.8            | 4.4            | 4.8            | 28          | 9          | 2               | 4             | 2               | 4           | 2           | 1           | 0          |
| 40          | 4              | 4.6            | 5              | 45          | 8          | 2               | 5             | 3               | 2           | 0           | 1           | 4          |
| 45          | 3.6            | 3.4            | 4.8            | 27          | 10         | 2               | 3             | 1               | 1           | 1           | 1           | 2          |
| 34          | 3.8            | 3              | 3              | 20          | 5          | 2               | 3             | 3               | 2           | 1           | 1           | 2          |
| 48          | 4.2            | 3.6            | 4              | 22          | 7          | 1               | 4             | 2               | 4           | 2           | 1           | 2          |
| 48          | 4              | 3.8            | 4.4            | 27          | 7          | 2               | 4             | 3               | 3           | 1           | 1           | 2          |
| 44          | 3.2            | 4              | 4              | 30          | 7          | 3               | 5             | 3               | 3           | 0           | 1           | 2          |
| 43          | 3              | 4.2            | 4.2            | 29          | 6          | 1               | 2             | 1               | 3           | 0           | 3           | 1          |
| 32          | 4.2            | 3.2            | 3.6            | 30          | 8          | 1               | 3             | 2               | 3           | 0           | 1           | 0          |
| 43          | 4              | 5              | 4.8            | 38          | 9          | 2               | 5             | 2               | 3           | 2           | 1           | 0          |
| 35          | 3.4            | 4.2            | 4              | 25          | 7          | 3               | 4             | 2               | 2           | 0           | 1           | 1          |
| 39          | 4.2            | 4.8            | 4.4            | 36          | 10         | 2               | 2             | 2               | 3           | 0           | 1           | 0          |
| 42          | 3.6            | 4              | 4.2            | 19          | 8          | 2               | 4             | 3               | 3           | 1           | 1           | 2          |
| 26          | 3.4            | 4.2            | 3.8            | 20          | 6          | 3               | 5             | 3               | 1           | 4           | 1           | 1          |
| 50          | 4.4            | 4              | 4.4            | 41          | 9          | 2               | 3             | 2               | 3           | 0           | 1           | 2          |
| 44          | 3.8            | 3.6            | 3.8            | 17          | 5          | 2               | 3             | 2               | 3           | 1           | 1           | 2          |
| 44          | 3.8            | 4              | 4.4            | 22          | 7          | 3               | 5             | 3               | 3           | 1           | 1           | 1          |

|    |     |     |     |    |    |   |   |   |   |   |   |   |
|----|-----|-----|-----|----|----|---|---|---|---|---|---|---|
| 33 | 3.2 | 3.6 | 4   | 12 | 4  | 2 | 4 | 2 | 2 | 0 | 1 | 3 |
| 41 | 4.2 | 3.4 | 3.2 | 17 | 7  | 2 | 4 | 1 | 3 | 1 | 1 | 2 |
| 48 | 4.8 | 4.4 | 4.4 | 32 | 9  | 2 | 5 | 2 | 4 | 1 | 1 | 0 |
| 31 | 3.6 | 4.2 | 4.2 | 32 | 8  | 1 | 5 | 2 | 1 | 0 | 1 | 2 |
| 48 | 4.4 | 4.4 | 4.8 | 18 | 5  | 3 | 5 | 3 | 3 | 1 | 1 | 3 |
| 48 | 3.8 | 4.2 | 4.8 | 30 | 8  | 3 | 3 | 3 | 3 | 1 | 1 | 0 |
| 26 | 3   | 4   | 3.8 | 31 | 6  | 2 | 5 | 3 | 1 | 0 | 2 | 3 |
| 29 | 4   | 3.8 | 4.2 | 21 | 6  | 1 | 2 | 2 | 2 | 1 | 1 | 3 |
| 47 | 3.8 | 3.8 | 4   | 36 | 10 | 2 | 5 | 2 | 3 | 1 | 1 | 2 |
| 43 | 4   | 4.4 | 4.6 | 33 | 8  | 2 | 5 | 3 | 3 | 0 | 1 | 2 |
| 43 | 3.6 | 4   | 4.2 | 22 | 7  | 3 | 4 | 3 | 4 | 4 | 1 | 1 |
| 35 | 3.8 | 4   | 4   | 27 | 9  | 1 | 4 | 3 | 1 | 1 | 1 | 3 |
| 42 | 3   | 4.8 | 4.6 | 22 | 7  | 1 | 5 | 3 | 3 | 1 | 1 | 0 |
| 40 | 3.4 | 4.4 | 4.2 | 28 | 7  | 2 | 4 | 3 | 3 | 1 | 1 | 2 |
| 39 | 3   | 3.8 | 3.8 | 27 | 9  | 2 | 5 | 1 | 3 | 0 | 1 | 3 |
| 41 | 3.8 | 4.6 | 4.4 | 15 | 4  | 2 | 4 | 1 | 3 | 1 | 1 | 0 |
| 44 | 4.2 | 4.4 | 3.8 | 11 | 4  | 2 | 4 | 2 | 3 | 0 | 1 | 3 |
| 39 | 3   | 3.4 | 3.8 | 17 | 7  | 3 | 5 | 3 | 2 | 1 | 1 | 0 |
| 42 | 3.6 | 4   | 4.4 | 51 | 11 | 3 | 5 | 4 | 4 | 1 | 1 | 2 |
| 34 | 4.6 | 4.6 | 4.6 | 24 | 8  | 2 | 5 | 3 | 2 | 4 | 3 | 3 |
| 29 | 2.8 | 4.2 | 3.8 | 26 | 7  | 1 | 4 | 1 | 2 | 4 | 1 | 0 |
| 43 | 3.2 | 4   | 4.4 | 20 | 6  | 2 | 3 | 2 | 4 | 1 | 1 | 2 |
| 43 | 3.8 | 3.6 | 3.8 | 18 | 7  | 2 | 5 | 2 | 3 | 0 | 1 | 4 |
| 46 | 4.2 | 3.6 | 4.4 | 19 | 8  | 3 | 4 | 3 | 3 | 1 | 1 | 2 |
| 29 | 3   | 4   | 4   | 21 | 7  | 4 | 4 | 4 | 2 | 2 | 1 | 2 |
| 40 | 3.6 | 4.2 | 4.2 | 17 | 8  | 2 | 1 | 1 | 3 | 1 | 1 | 2 |
| 50 | 4   | 4   | 4   | 18 | 4  | 3 | 3 | 2 | 3 | 0 | 1 | 3 |
| 39 | 4.6 | 4   | 4.2 | 11 | 5  | 4 | 5 | 3 | 2 | 0 | 2 | 2 |
| 44 | 3.6 | 4.6 | 4.2 | 17 | 7  | 2 | 3 | 3 | 2 | 1 | 1 | 3 |
| 39 | 4   | 3.2 | 4   | 17 | 4  | 2 | 5 | 2 | 3 | 1 | 1 | 2 |
| 39 | 3.6 | 3.8 | 4   | 34 | 6  | 2 | 4 | 3 | 3 | 0 | 2 | 2 |
| 48 | 2.8 | 4   | 3.8 | 23 | 9  | 2 | 3 | 2 | 2 | 1 | 1 | 2 |
| 44 | 4   | 3.8 | 4.4 | 17 | 7  | 3 | 5 | 3 | 3 | 1 | 2 | 4 |
| 33 | 3.6 | 3.6 | 3.6 | 17 | 7  | 1 | 4 | 3 | 2 | 0 | 3 | 2 |
| 43 | 3   | 4.8 | 4.6 | 22 | 7  | 2 | 4 | 2 | 3 | 0 | 1 | 0 |
| 32 | 3   | 4.2 | 4   | 9  | 6  | 3 | 5 | 3 | 3 | 2 | 1 | 2 |
| 33 | 3.6 | 4.6 | 4.2 | 18 | 6  | 1 | 3 | 1 | 2 | 0 | 1 | 0 |
| 24 | 2.6 | 3.8 | 3.6 | 8  | 4  | 1 | 0 | 1 | 1 | 0 | 1 | 0 |
| 43 | 3.2 | 3.8 | 4.4 | 21 | 4  | 2 | 3 | 2 | 2 | 1 | 1 | 0 |
| 31 | 3.6 | 4.8 | 4.6 | 23 | 8  | 2 | 5 | 4 | 3 | 1 | 3 | 2 |
| 40 | 3.4 | 3.6 | 4   | 20 | 6  | 2 | 4 | 2 | 3 | 1 | 1 | 2 |
| 38 | 3.6 | 5   | 5   | 10 | 3  | 2 | 4 | 2 | 3 | 1 | 2 | 3 |
| 43 | 4   | 3.8 | 3   | 15 | 4  | 2 | 5 | 3 | 3 | 0 | 1 | 1 |
| 38 | 4   | 4.2 | 4.2 | 28 | 9  | 2 | 4 | 2 | 3 | 0 | 1 | 2 |
| 45 | 4   | 5   | 4.8 | 23 | 8  | 2 | 4 | 3 | 4 | 4 | 1 | 0 |
| 37 | 3.4 | 4.2 | 4   | 19 | 8  | 2 | 4 | 2 | 2 | 1 | 1 | 2 |
| 43 | 3.4 | 5   | 4.8 | 26 | 8  | 2 | 3 | 2 | 3 | 2 | 1 | 3 |
| 46 | 3.6 | 4.2 | 3.8 | 20 | 7  | 3 | 3 | 3 | 2 | 1 | 1 | 3 |
| 40 | 3.4 | 4.2 | 4.2 | 21 | 6  | 3 | 5 | 3 | 2 | 4 | 1 | 4 |

|    |     |     |     |    |    |   |   |   |   |   |   |   |
|----|-----|-----|-----|----|----|---|---|---|---|---|---|---|
| 39 | 3.6 | 3.8 | 4.4 | 15 | 4  | 2 | 3 | 2 | 2 | 0 | 1 | 4 |
| 37 | 4   | 2.6 | 4   | 14 | 4  | 2 | 4 | 2 | 1 | 0 | 1 | 3 |
| 45 | 3.8 | 4.6 | 4.8 | 25 | 8  | 3 | 5 | 2 | 4 | 0 | 2 | 1 |
| 40 | 3   | 4.2 | 4.2 | 26 | 7  | 2 | 5 | 3 | 3 | 0 | 1 | 0 |
| 46 | 4.2 | 3.8 | 4.4 | 35 | 7  | 3 | 5 | 3 | 4 | 2 | 1 | 2 |
| 41 | 4.6 | 4.2 | 4.4 | 20 | 5  | 3 | 4 | 4 | 3 | 4 | 1 | 3 |
| 49 | 3.6 | 4.6 | 4.2 | 17 | 7  | 2 | 5 | 3 | 4 | 2 | 1 | 2 |
| 45 | 3.4 | 2.8 | 4.2 | 15 | 5  | 3 | 4 | 2 | 3 | 1 | 2 | 2 |
| 38 | 4.4 | 3.2 | 4.4 | 16 | 5  | 2 | 4 | 3 | 3 | 0 | 1 | 0 |
| 40 | 4   | 4.8 | 4.8 | 28 | 6  | 1 | 5 | 1 | 4 | 0 | 1 | 0 |
| 24 | 3   | 4.4 | 3.8 | 19 | 9  | 3 | 5 | 2 | 2 | 1 | 1 | 0 |
| 42 | 3.8 | 3.8 | 4.2 | 23 | 10 | 3 | 5 | 4 | 2 | 1 | 1 | 2 |
| 39 | 4   | 4.6 | 4.4 | 16 | 7  | 3 | 5 | 3 | 3 | 3 | 1 | 2 |
| 36 | 2.8 | 4.6 | 4   | 15 | 7  | 3 | 3 | 3 | 2 | 1 | 1 | 2 |
| 28 | 1   | 1   | 1   | 3  | 2  | 1 | 1 | 1 | 0 | 1 | 2 | 0 |
| 21 | 4.4 | 4.2 | 4   | 38 | 7  | 5 | 5 | 4 | 2 | 2 | 1 | 2 |
| 40 | 3.4 | 3.4 | 4   | 16 | 5  | 4 | 4 | 3 | 3 | 1 | 1 | 1 |
| 45 | 3   | 5   | 5   | 17 | 7  | 2 | 5 | 2 | 2 | 0 | 1 | 0 |
| 35 | 3.4 | 4.8 | 4.6 | 27 | 5  | 3 | 5 | 3 | 3 | 2 | 1 | 0 |
| 24 | 3.4 | 4   | 4   | 27 | 7  | 2 | 4 | 2 | 2 | 0 | 1 | 3 |
| 22 | 3.2 | 3.2 | 3.8 | 17 | 5  | 3 | 3 | 3 | 1 | 1 | 1 | 2 |
| 44 | 4.2 | 4.8 | 4.8 | 29 | 7  | 3 | 5 | 3 | 3 | 3 | 1 | 4 |
| 40 | 3.6 | 4.8 | 4.4 | 35 | 9  | 3 | 5 | 2 | 3 |   | 1 | 2 |
| 41 | 3.4 | 4.4 | 4.4 | 15 | 6  | 3 | 5 | 3 | 3 | 4 | 1 | 1 |
| 40 | 4   | 3.8 | 4.4 | 36 | 9  | 3 | 4 | 3 | 3 | 1 | 1 | 1 |
| 43 | 3.8 | 4.6 | 4.4 | 28 | 8  | 3 | 5 | 3 | 2 | 1 | 1 | 2 |
| 41 | 2.6 | 3.8 | 3.6 | 25 | 7  | 3 | 4 | 3 | 3 | 1 | 1 | 1 |
| 35 | 3.4 | 4.2 | 4   | 9  | 2  | 3 | 5 | 3 | 2 | 0 | 1 | 2 |
| 35 | 3.2 | 4.6 | 4.4 | 17 | 7  | 3 | 1 | 3 | 3 | 0 | 2 | 2 |
| 39 | 3.4 | 4.8 | 5   | 22 | 8  | 2 | 5 | 3 | 4 | 2 | 2 | 2 |
| 44 | 3.8 | 4.8 | 4.4 | 48 | 10 | 2 | 5 | 4 | 4 | 4 | 1 | 3 |
| 36 | 3.2 | 3.4 | 3.8 | 31 | 9  | 4 | 3 | 4 | 3 | 1 | 1 | 0 |
| 35 | 3.8 | 4   | 3.8 | 21 | 8  | 2 | 5 | 3 | 3 | 2 | 1 | 2 |
| 32 | 3.4 | 3.8 | 4   | 19 | 7  | 2 | 4 | 2 | 2 |   | 1 | 2 |
| 41 | 3.2 | 4.6 | 4.6 | 41 | 8  |   |   |   | 2 |   |   |   |
| 34 | 4.6 | 4.6 | 4.4 | 23 | 6  | 2 | 5 | 5 | 3 | 4 | 1 | 3 |
| 34 | 4   | 4.4 | 4.4 | 19 | 5  | 3 | 5 | 3 | 3 | 1 | 2 | 3 |
| 43 | 3.6 | 4.4 | 4.2 | 15 | 4  |   |   |   | 3 |   |   |   |
| 38 | 3   | 3.8 | 4   | 16 | 5  | 4 | 4 | 4 | 2 | 1 | 1 | 3 |
| 45 | 3.8 | 3.8 | 4   | 15 | 4  | 2 | 5 | 3 | 4 | 4 | 1 | 2 |
| 41 | 3.8 | 4.6 | 4.4 | 20 | 5  | 3 | 5 | 3 | 3 | 1 | 1 | 2 |
| 39 | 4   | 4   | 4   | 17 | 9  | 1 | 3 | 2 | 2 | 1 | 1 | 2 |
| 45 | 2.8 | 4   | 4   | 26 | 8  | 2 | 4 | 3 | 2 | 1 | 1 | 2 |
| 43 | 4.4 | 4   | 4   | 40 | 8  | 2 | 3 | 2 | 3 | 1 | 1 | 0 |
| 22 | 2.2 | 3.8 | 3.6 | 11 | 3  | 5 | 2 | 1 | 0 | 0 | 1 | 0 |
| 38 | 3.6 | 5   | 5   | 20 | 8  | 3 | 5 | 3 | 4 | 1 | 1 | 1 |
| 40 | 3.8 | 3.8 | 4.8 | 15 | 6  | 4 | 5 | 2 | 2 | 1 | 1 | 2 |
| 39 | 3.2 | 4.4 | 4.6 | 22 | 7  | 2 | 5 | 2 | 3 | 2 | 1 | 2 |
| 32 | 3.4 | 4.2 | 4.2 | 7  | 4  | 2 | 1 |   | 3 | 0 | 2 | 2 |

|    |     |     |     |    |    |   |   |   |   |   |   |   |
|----|-----|-----|-----|----|----|---|---|---|---|---|---|---|
| 37 | 3   | 4   | 4.4 | 28 | 7  | 2 | 3 |   | 3 | 1 | 1 | 2 |
| 39 | 4   | 4.6 | 4.6 | 17 | 6  | 2 | 5 | 2 | 4 | 0 | 2 | 4 |
| 44 | 4.2 | 4.4 | 4.8 | 22 | 8  | 3 | 5 | 3 | 3 |   |   | 0 |
| 40 | 3.6 | 4.4 | 4.6 | 15 | 6  | 5 | 5 | 3 | 4 | 1 | 2 | 3 |
| 29 | 3.8 | 4   | 4.2 | 31 | 5  | 3 | 5 | 3 | 2 | 3 | 1 | 2 |
| 51 | 3   | 4   | 4.4 | 15 | 6  | 3 | 5 | 3 | 3 | 1 |   | 2 |
| 41 | 3.4 | 5   | 4.6 | 15 | 5  | 2 | 5 | 4 | 3 | 0 | 1 | 3 |
| 41 | 4.2 | 4.4 | 4.2 | 24 | 7  | 3 | 4 | 2 | 3 | 1 | 1 | 2 |
| 48 | 4.2 | 4.8 | 4.6 | 38 | 7  | 2 | 5 | 2 | 3 | 0 | 1 | 3 |
| 44 | 4.4 | 4.4 | 4   | 12 | 4  | 2 | 4 | 2 | 3 | 1 | 1 | 4 |
| 42 | 4   | 5   | 4.6 | 38 | 7  |   |   |   | 2 |   |   |   |
| 47 | 4.4 | 4   | 4.8 | 23 | 4  | 3 | 5 | 3 | 3 | 1 | 2 | 3 |
| 40 | 3.4 | 4   | 4   | 28 | 7  | 4 | 5 | 4 | 2 | 1 | 1 | 1 |
| 39 | 3.8 | 3.4 | 3.8 | 39 | 10 | 3 | 5 | 3 | 3 | 2 | 1 | 2 |
| 42 | 3   | 4.2 | 4   | 24 | 7  | 1 | 3 | 2 | 3 | 2 | 1 | 2 |
| 43 | 3.6 | 4   | 4   | 51 | 8  |   |   |   | 3 |   |   |   |
| 39 | 3.6 | 4.2 | 4.6 | 24 | 7  | 3 | 5 | 2 | 4 | 1 | 1 | 0 |
| 49 | 4.2 | 4.6 | 4.4 | 19 | 11 |   |   | 3 | 3 |   | 1 |   |
| 44 | 3.8 | 4.8 | 4.6 | 16 | 6  | 2 | 5 | 3 | 4 | 4 | 1 | 0 |
| 37 | 3   | 4.4 | 4.4 | 20 | 7  | 2 | 5 | 4 | 2 | 0 | 1 | 1 |
| 40 | 3.4 | 4.8 | 4.8 | 18 | 4  | 2 | 4 | 3 | 4 | 2 | 1 | 2 |
| 36 | 4.4 | 4.2 | 4.6 | 9  | 4  |   |   |   | 3 |   |   |   |
| 44 | 4   | 3.6 | 4.6 | 40 | 7  |   |   |   | 2 |   |   |   |
| 47 | 4.2 | 4.8 | 4.8 | 10 | 3  | 1 | 5 | 1 | 4 | 0 | 1 | 4 |
| 43 | 4   | 4.4 | 4.8 | 23 | 7  | 2 | 4 | 2 | 4 | 2 | 1 | 2 |
| 43 | 3   | 4   | 3.8 | 17 | 4  |   |   |   | 2 | 0 | 1 |   |
| 31 | 3.6 | 4   | 4   | 22 | 9  | 2 | 4 | 3 | 3 | 1 | 1 | 0 |
| 43 | 4.2 | 4   | 4.2 | 15 | 6  | 1 | 5 | 1 | 3 | 0 | 1 | 2 |
| 42 | 3.8 | 4   | 4.6 | 18 | 7  |   |   |   | 3 |   |   |   |
| 46 | 3.6 | 4.4 | 4.8 | 37 | 10 | 1 | 4 | 2 | 3 | 2 | 1 | 0 |
| 39 | 4.4 | 3.4 | 4   | 16 | 7  | 2 | 5 | 3 | 2 | 1 | 1 | 1 |
| 31 | 3.2 | 4.4 | 4.2 | 25 | 8  | 2 | 5 | 3 | 1 | 1 | 1 | 2 |
| 45 | 4   | 3.4 | 4.6 | 11 | 6  | 2 | 5 | 2 | 3 | 2 | 1 | 1 |
| 39 | 4.6 | 4.6 | 4.6 | 19 | 9  | 2 | 5 | 4 | 1 | 1 | 1 | 3 |
| 37 | 4.6 | 4.2 | 4.6 | 27 | 8  | 3 | 5 | 4 | 3 | 1 | 1 | 2 |
| 46 | 4.2 | 4.6 | 4.4 | 19 | 6  | 4 | 5 | 4 | 2 | 0 | 2 | 4 |
| 38 | 4.6 | 3.8 | 4.2 | 26 | 7  | 4 | 5 | 3 | 3 | 3 | 1 | 4 |
| 44 | 3.2 | 4.4 | 3.6 | 18 | 8  | 1 | 4 | 2 | 3 | 1 | 1 | 2 |
| 40 | 2   | 4.6 | 4.2 | 12 | 6  | 3 | 4 | 3 | 3 | 1 | 1 | 1 |
| 34 | 3.2 | 3.6 | 3.8 | 11 | 3  | 4 | 3 | 4 | 1 | 1 | 3 | 3 |
| 45 | 4   | 4.2 | 4   | 22 | 4  |   |   |   | 2 |   |   |   |
| 35 | 3.6 | 3.4 | 3.4 | 18 | 4  | 2 | 4 | 2 | 2 | 0 | 1 | 2 |
| 36 | 3.2 | 3.8 | 3.8 | 24 | 5  |   |   |   | 2 |   |   |   |
| 41 | 3.2 | 4.2 | 4.2 | 16 | 4  | 2 | 5 | 3 | 3 |   | 1 | 2 |
| 28 | 3.4 | 3.2 | 4   | 7  | 4  |   |   |   | 1 |   |   |   |
| 39 | 4   | 4.2 | 4.8 | 9  | 5  | 2 | 3 | 4 | 2 | 1 | 1 | 1 |
| 33 | 3.4 | 4   | 3.8 | 29 | 7  | 2 | 3 | 2 | 2 | 1 | 1 | 2 |
| 29 | 3.2 | 3.8 | 3.8 | 27 | 9  | 3 | 5 | 1 | 2 | 0 | 1 | 3 |
| 36 | 3.6 | 3.8 | 3.6 | 13 | 5  | 3 | 3 | 2 | 3 | 2 | 1 | 1 |

|    |     |     |     |    |    |   |   |   |   |   |   |   |
|----|-----|-----|-----|----|----|---|---|---|---|---|---|---|
| 40 | 3.6 | 4   | 3.8 | 18 | 6  | 2 | 4 | 2 | 2 | 1 | 2 | 1 |
| 37 | 3.6 | 4   | 4.2 | 23 | 6  | 3 | 4 | 3 | 2 | 2 | 1 | 3 |
| 42 | 3.4 | 3.6 | 3.4 | 19 | 6  | 2 | 4 | 2 | 2 | 1 | 2 | 2 |
| 32 | 3   | 4.2 | 3.8 | 27 | 9  | 3 | 5 | 3 | 3 | 1 | 1 | 1 |
| 47 | 3.4 | 4   | 4.4 | 21 | 8  | 3 | 4 | 4 | 4 | 0 | 1 | 1 |
| 24 | 3.6 | 3.6 | 3.6 | 14 | 4  | 2 | 4 | 2 | 2 | 0 | 1 | 2 |
| 36 | 3.8 | 5   | 4   | 21 | 7  | 2 | 2 | 4 | 2 | 1 | 1 | 0 |
| 33 | 3.4 | 4.2 | 4.2 | 14 | 7  | 3 | 4 | 3 | 3 | 1 | 1 | 0 |
| 29 | 3   | 4.8 | 4.2 | 27 | 5  | 2 | 5 | 3 | 2 | 2 | 1 | 2 |
| 42 | 3.8 | 4   | 4   | 28 | 8  | 1 | 4 | 2 | 3 | 2 | 1 | 2 |
| 41 | 3.6 | 4.2 | 4.6 | 12 | 5  | 3 | 5 | 3 | 3 | 1 | 1 | 2 |
| 32 | 3   | 3.4 | 4.4 | 36 | 7  | 3 | 5 | 3 | 3 | 4 | 1 | 2 |
| 41 | 3.8 | 3.2 | 3.6 | 23 | 8  |   |   |   | 3 |   |   |   |
| 30 | 3.4 | 5   | 4.2 | 16 | 4  | 1 | 1 | 1 | 2 | 0 | 1 | 0 |
| 43 | 4   | 3.6 | 4.6 | 16 | 6  | 3 | 5 | 4 | 3 | 1 | 1 | 2 |
| 37 | 3.8 | 3.8 | 4.4 | 20 | 10 | 2 | 2 | 2 | 2 | 1 | 1 | 2 |
| 37 | 3.6 | 4.2 | 4.4 | 25 | 6  | 2 | 3 | 2 | 3 | 0 | 1 | 1 |
| 40 | 4.4 | 4.4 | 4.2 | 13 | 7  | 4 | 4 | 4 | 2 | 1 | 1 | 0 |
| 29 | 2.6 | 4.2 | 4.4 | 16 | 8  | 2 | 3 | 3 | 2 | 0 | 1 | 2 |
| 32 | 4   | 4.2 | 4   | 18 | 6  | 3 | 5 | 3 | 2 | 3 | 1 | 2 |
| 38 | 3.8 | 4.6 | 4.8 | 20 | 3  | 4 | 5 | 4 | 3 | 4 | 1 | 1 |
| 35 | 4.2 | 3.8 | 4.6 | 17 | 7  | 3 | 5 | 3 | 1 | 2 | 1 | 3 |
| 40 | 4.6 | 4.2 | 4.4 | 35 | 10 | 3 | 5 | 3 | 3 | 2 | 1 | 3 |
| 42 | 4.2 | 4.2 | 4.2 | 27 | 9  | 2 | 4 | 2 | 3 | 1 | 1 | 1 |
| 34 | 4   | 3.6 | 3.6 | 44 | 10 | 3 | 5 | 3 | 3 | 1 | 1 | 3 |
| 39 | 3.2 | 4   | 3.8 | 38 | 7  | 2 | 4 | 3 | 3 | 1 | 1 | 2 |
| 39 | 3.4 | 3.6 | 4.2 | 17 | 6  | 1 | 3 | 2 | 2 | 1 | 1 | 2 |
| 31 | 3.8 | 3.8 | 4.2 | 18 | 5  | 3 | 5 | 3 | 1 | 3 | 1 | 3 |
| 32 | 3.8 | 3.4 | 3.4 | 5  | 2  | 1 | 3 | 2 | 2 | 3 | 1 | 0 |
| 34 | 3.2 | 3.4 | 4.6 | 21 | 5  | 2 | 5 | 3 | 3 | 1 | 3 | 2 |
| 40 | 3.6 | 5   | 4.8 | 18 | 5  | 3 | 5 | 3 | 4 | 1 | 3 | 2 |
| 41 | 4.6 | 4   | 4.4 | 14 | 5  | 3 | 5 | 2 | 4 | 4 | 1 | 1 |
| 42 | 3.4 | 4   | 4.4 | 10 | 4  | 1 | 4 | 2 | 2 | 1 | 1 | 3 |
| 32 | 3.6 | 4   | 3.8 | 18 | 6  | 2 | 4 | 2 | 2 | 2 | 1 | 2 |
| 29 | 3.4 | 3.6 | 4   | 6  | 3  | 2 | 4 | 2 | 2 | 0 | 1 | 2 |
| 36 | 2.8 | 4.8 | 4.4 | 15 | 6  | 2 | 5 | 3 | 3 | 3 | 2 | 2 |
| 48 | 4   | 4   | 4   | 21 | 8  | 2 | 5 | 4 | 3 | 1 | 1 | 1 |
| 37 | 4.2 | 4.2 | 4.2 | 14 | 5  | 2 | 5 | 4 | 3 | 1 | 1 | 1 |
| 19 | 3   | 4.6 | 4   | 8  | 4  | 2 | 5 | 2 | 0 | 0 | 1 | 0 |
| 42 | 3.4 | 4.2 | 4.4 | 14 | 7  | 2 | 3 | 3 | 3 | 1 | 1 | 2 |
| 35 | 3.8 | 3.8 | 4   | 12 | 5  | 2 | 4 | 2 | 2 | 1 | 3 | 2 |
| 35 | 4.2 | 3.4 | 4.2 | 17 | 5  | 3 | 5 | 3 | 4 | 1 | 1 | 2 |
| 29 | 2.8 | 4.2 | 3.2 | 19 | 7  | 1 | 2 | 1 | 2 | 0 | 3 | 2 |
| 37 | 3.6 | 4.6 | 4   | 15 | 6  | 3 | 2 | 3 | 2 | 1 | 3 | 0 |
| 44 | 3.8 | 4.4 | 4.4 | 21 | 4  | 3 | 5 | 4 | 3 | 1 | 1 | 2 |
| 45 | 3.8 | 4.4 | 4.4 | 30 | 9  | 3 | 5 | 3 | 3 | 2 | 1 | 2 |
| 39 | 3.4 | 4.4 | 4.4 | 16 | 5  | 2 | 5 | 3 | 3 | 1 | 1 | 0 |
| 41 | 4   | 4.6 | 4.8 | 30 | 5  | 2 | 5 | 3 | 3 | 1 | 1 | 3 |
| 45 | 3.4 | 4.6 | 4.2 | 18 | 6  | 1 | 5 | 3 | 3 | 2 | 1 | 1 |

|    |     |     |     |    |    |   |   |   |   |   |   |   |
|----|-----|-----|-----|----|----|---|---|---|---|---|---|---|
| 44 | 3.6 | 3.8 | 4.4 | 23 | 7  | 3 | 5 | 3 | 3 | 3 | 1 | 1 |
| 32 | 3.8 | 4.4 | 3.8 | 31 | 9  | 2 | 5 | 3 | 2 | 3 | 3 | 1 |
| 22 | 2.6 | 3.8 | 3.4 | 14 | 5  | 1 | 5 | 3 | 2 | 3 | 1 | 2 |
| 45 | 3.4 | 3.8 | 4.6 | 23 | 10 | 2 | 3 | 2 | 3 | 1 | 2 | 2 |
| 37 | 3.8 | 3.6 | 4.2 | 21 | 6  | 2 | 3 | 2 | 4 | 2 | 1 | 1 |
| 41 | 4   | 3.8 | 3   | 7  | 2  | 3 | 5 | 3 | 2 | 4 | 2 | 4 |
| 40 | 4.2 | 3.6 | 4.2 | 12 | 4  | 2 | 2 | 2 | 3 | 0 | 1 | 3 |
| 34 | 3   | 3.8 | 3.8 | 24 | 10 | 1 | 3 | 2 | 2 | 1 | 1 | 2 |
| 31 | 3.6 | 3.4 | 3   | 18 | 6  | 3 | 4 | 1 | 2 | 0 | 1 | 2 |
| 47 | 3.6 | 5   | 4.8 | 18 | 6  | 3 | 5 | 3 | 2 | 2 | 1 | 1 |
| 40 | 3   | 4.4 | 4.6 | 33 | 7  | 3 | 5 | 3 | 3 | 2 | 1 | 1 |
| 39 | 3.4 | 4.4 | 4.4 | 41 | 9  | 3 | 5 | 3 | 3 | 2 | 1 | 1 |
| 33 | 3.6 | 4.4 | 4.4 | 30 | 7  | 3 | 5 | 4 | 3 | 1 | 1 | 2 |
| 31 | 4.2 | 4.8 | 4   | 25 | 5  | 3 | 4 | 2 | 4 | 1 | 1 | 2 |
| 46 | 4.2 | 3.8 | 4.2 | 26 | 7  | 3 | 4 | 3 | 3 | 1 | 1 | 2 |
| 42 | 3.8 | 4.6 | 4.2 | 21 | 6  | 3 | 5 | 3 | 3 | 3 | 1 | 2 |
| 47 | 4   | 3.8 | 3.8 | 44 | 10 | 3 | 5 | 3 | 4 | 1 | 1 | 2 |
| 43 | 3.6 | 4.4 | 4.4 | 38 | 6  | 3 | 5 | 2 | 3 | 2 | 1 | 2 |
| 39 | 3.8 | 3.8 | 4   | 32 | 9  | 3 | 5 | 3 | 3 | 4 | 2 | 2 |
| 43 | 3.8 | 4.8 | 4.8 | 30 | 6  | 3 | 5 | 3 | 3 | 4 | 1 | 0 |
| 40 | 3.6 | 3.8 | 4.6 | 27 | 6  | 2 | 4 | 2 | 2 | 1 | 1 | 1 |
| 36 | 3.2 | 4   | 4.2 | 19 | 7  | 2 | 3 | 2 | 3 | 1 | 2 | 2 |
| 27 | 3.4 | 3.8 | 3.6 | 30 | 8  | 1 | 5 | 3 | 2 | 1 | 1 | 1 |
| 36 | 4.6 | 3.8 | 4.2 | 18 | 5  | 3 | 3 | 2 | 2 | 0 | 1 | 2 |
| 21 | 3.6 | 4   | 4.2 | 11 | 4  | 2 | 4 | 1 | 1 | 2 | 1 | 2 |
| 41 | 3.6 | 4   | 4.4 | 9  | 3  | 2 | 5 | 4 | 3 | 0 | 1 | 2 |
| 35 | 4   | 4.6 | 4.4 | 33 | 11 | 3 | 5 | 3 | 3 | 1 | 3 | 2 |
| 28 | 3.2 | 4   | 4.2 | 15 | 6  | 2 | 4 | 3 | 2 | 1 | 1 | 2 |
| 48 | 3.2 | 4.4 | 4.6 | 33 | 8  | 2 | 5 | 2 | 3 | 3 | 1 | 1 |
| 40 | 3.6 | 4.4 | 4   | 17 | 8  | 2 | 5 | 4 | 3 | 4 | 1 | 2 |
| 33 | 4   | 3.8 | 3.6 | 27 | 8  | 3 | 3 | 3 | 3 | 1 | 1 | 2 |
| 35 | 3.6 | 3.6 | 4.2 | 23 | 8  | 1 | 3 | 2 | 2 | 2 | 1 | 2 |
| 42 | 3.6 | 4.8 | 4.8 | 24 | 5  | 1 | 2 | 2 | 1 | 0 | 1 | 2 |
| 33 | 3.4 | 4   | 4.2 | 38 | 9  | 3 | 4 | 3 | 2 | 1 | 1 | 2 |
| 34 | 4.4 | 3.6 | 3.4 | 13 | 6  | 1 | 5 | 2 | 1 | 1 | 1 | 3 |
| 38 | 3   | 4.4 | 4.8 | 22 | 7  | 2 | 5 | 3 | 3 | 1 | 1 | 2 |
| 41 | 3.4 | 4.4 | 4   | 15 | 4  | 4 | 4 | 2 | 2 | 0 | 1 | 2 |
| 32 | 3.2 | 3.4 | 3.4 | 31 | 8  | 2 | 4 | 1 | 2 | 1 | 1 | 4 |
| 29 | 3.2 | 3.6 | 3.6 | 13 | 2  | 2 | 4 | 2 | 2 | 0 | 1 | 1 |
| 37 | 3.8 | 4   | 4.4 | 20 | 5  | 1 | 5 | 3 | 2 | 0 | 1 | 2 |
| 43 | 3.6 | 4.6 | 4.6 | 22 | 10 | 1 | 4 | 2 | 3 | 1 | 1 | 0 |
| 30 | 4   | 4.2 | 3.6 | 26 | 6  | 2 | 4 | 4 | 1 | 0 | 1 | 3 |
| 28 | 3.4 | 3.6 | 3.8 | 19 | 6  | 1 | 1 | 1 | 1 | 0 | 1 | 2 |
| 36 | 4.2 | 4.4 | 4.2 | 16 | 5  | 2 | 4 | 2 | 2 | 2 | 1 | 0 |
| 42 | 3.8 | 3.6 | 4   | 28 | 5  | 2 | 5 | 4 | 3 | 2 | 1 | 3 |
| 40 | 3.4 | 4.2 | 4.4 | 11 | 4  | 2 | 5 | 3 | 2 | 2 | 1 | 1 |
| 37 | 4   | 3.8 | 3.6 | 10 | 4  | 1 | 4 | 2 | 2 | 0 | 1 | 0 |
| 42 | 3.2 | 4.2 | 4.6 | 13 | 6  | 2 | 5 | 1 | 2 | 1 | 1 | 1 |
| 40 | 3.2 | 4   | 4.2 | 27 | 8  | 2 | 4 | 2 | 2 | 1 | 1 | 0 |

|    |     |     |     |    |    |   |   |   |   |   |   |   |
|----|-----|-----|-----|----|----|---|---|---|---|---|---|---|
| 37 | 3   | 3.8 | 4   | 19 | 5  | 2 | 5 | 2 | 3 | 3 | 1 | 1 |
| 37 | 3   | 4.4 | 4.4 | 25 | 7  | 2 | 3 | 3 | 3 | 2 | 1 | 2 |
| 31 | 4   | 4.4 | 4.8 | 17 | 4  | 3 | 5 | 4 | 2 | 2 | 3 | 2 |
| 32 | 3.4 | 3.8 | 4.2 | 16 | 7  | 2 | 3 | 2 | 2 | 1 | 1 | 0 |
| 32 | 3.8 | 4.4 | 3.8 | 30 | 6  | 3 | 4 | 2 | 4 | 1 | 3 | 1 |
| 36 | 3.6 | 4   | 3.8 | 25 | 9  | 2 | 5 | 2 | 3 | 1 | 2 | 2 |
| 47 | 3.6 | 4.8 | 4.2 | 35 | 9  | 4 | 5 | 4 | 4 | 1 | 2 | 2 |
| 32 | 2.8 | 3.4 | 3.6 | 21 | 6  | 2 | 3 | 2 | 3 | 0 | 2 | 2 |
| 29 | 3.6 | 4.2 | 4   | 12 | 8  | 2 | 5 | 4 | 2 | 1 | 3 | 3 |
| 24 | 2.8 | 4   | 3.8 | 17 | 5  | 1 | 2 | 1 | 2 | 1 | 1 | 0 |
| 29 | 2.4 | 3.4 | 3.8 | 13 | 6  | 2 | 4 | 2 | 2 | 2 | 1 | 2 |
| 41 | 3   | 3.6 | 4   | 16 | 7  | 2 | 4 | 3 | 2 | 2 | 1 | 2 |
| 37 | 3.6 | 4   | 3.8 | 16 | 6  | 1 | 4 | 2 | 2 | 2 | 1 | 3 |
| 35 | 3.4 | 4.4 | 4.6 | 20 | 5  | 1 | 4 | 3 | 3 | 1 | 1 | 1 |
| 39 | 3.6 | 4.4 | 4.4 | 40 | 9  | 1 | 1 | 1 | 3 | 0 | 1 | 2 |
| 31 | 3.2 | 4.2 | 4.2 | 16 | 6  | 1 | 4 | 2 | 1 | 0 | 1 | 0 |
| 35 | 3.6 | 4.8 | 4.8 | 32 | 8  | 2 | 5 | 3 | 3 | 3 | 1 | 0 |
| 31 | 3.8 | 4.2 | 4   | 10 | 4  | 3 | 4 | 2 | 2 | 2 | 1 | 2 |
| 28 | 3.4 | 3.2 | 3.8 | 7  | 4  | 2 | 4 | 2 | 2 | 0 | 1 | 1 |
| 32 | 3.4 | 3.8 | 4.2 | 23 | 5  | 2 | 4 | 2 | 3 | 0 | 1 | 0 |
| 46 | 3.6 | 4.2 | 4.6 | 53 | 11 | 2 | 4 | 3 | 4 | 1 | 1 | 2 |
| 38 | 4.2 | 5   | 4.8 | 31 | 9  | 3 | 4 | 3 | 4 | 1 | 1 | 3 |
| 41 | 3.4 | 5   | 5   | 31 | 7  | 2 | 5 | 3 | 3 | 2 | 1 | 1 |
| 35 | 3.6 | 3.8 | 3.8 | 27 | 6  | 2 | 3 | 2 | 2 | 2 | 1 | 2 |
| 34 | 3.6 | 4.8 | 4.2 | 18 | 4  | 3 | 5 | 3 | 3 | 4 | 1 | 4 |
| 42 | 2.2 | 4   | 4.2 | 31 | 6  | 2 | 3 | 2 | 4 | 2 | 1 | 0 |
| 34 | 2.8 | 4.2 | 4.8 | 7  | 4  | 1 | 2 | 2 | 3 | 1 | 1 | 0 |
| 31 | 3.4 | 3.4 | 4.6 | 21 | 5  | 3 | 5 | 3 | 1 | 0 | 3 | 3 |
| 29 | 2.6 | 4.8 | 4.6 | 15 | 6  | 4 | 4 | 4 | 3 | 0 | 1 | 1 |
| 38 | 4.4 | 4   | 3.8 | 19 | 6  | 3 | 5 | 4 | 3 | 3 | 1 | 0 |
| 33 | 3.4 | 3.6 | 4   | 16 | 5  | 2 | 4 | 2 | 2 | 2 | 1 | 1 |
| 34 | 2.8 | 4   | 4.2 | 26 | 7  | 2 | 5 | 3 | 2 | 2 | 1 | 3 |
| 39 | 2.6 | 4   | 4   | 27 | 7  | 3 | 5 | 4 | 3 | 3 | 1 | 0 |
| 47 | 3.2 | 4   | 4.2 | 21 | 8  | 2 | 5 | 4 | 2 | 1 | 1 | 2 |
| 43 | 4   | 3.6 | 4   | 25 | 10 | 1 | 2 | 1 | 3 | 0 | 3 | 2 |
| 38 | 3.6 | 3.8 | 4.2 | 16 | 5  | 4 | 5 | 4 | 3 | 3 | 2 | 2 |
| 41 | 3.4 | 4.2 | 4.4 | 26 | 8  | 2 | 3 | 1 | 3 | 1 | 1 | 2 |
| 39 | 4   | 4.4 | 4.6 | 19 | 7  | 3 | 5 | 4 | 2 | 4 | 1 | 2 |
| 39 | 3.4 | 4   | 4.2 | 18 | 6  | 2 | 4 | 2 | 2 | 2 | 1 | 2 |
| 32 | 3.6 | 3.8 | 3.6 | 26 | 5  | 3 | 3 | 3 | 2 | 2 | 1 | 1 |
| 42 | 3   | 4.8 | 4.2 | 31 | 8  | 2 | 5 | 2 | 4 | 2 | 1 | 0 |
| 39 | 4.6 | 4.4 | 4.2 | 13 | 4  | 3 | 5 | 3 | 3 | 4 | 1 | 2 |
| 21 | 3.8 | 3   | 3.8 | 16 | 6  | 2 | 1 | 1 | 1 | 0 | 1 | 2 |
| 40 | 4.2 | 4.6 | 5   | 29 | 6  | 2 | 4 | 3 | 3 | 1 | 1 | 0 |
| 33 | 3.4 | 4   | 3.6 | 13 | 4  | 2 | 5 | 2 | 2 | 1 | 1 | 3 |
| 45 | 2.8 | 3.6 | 4.4 | 14 | 5  | 1 | 3 | 2 | 2 | 1 | 1 | 2 |
| 41 | 3.4 | 5   | 5   | 21 | 8  | 1 | 5 | 1 | 4 | 1 | 1 | 4 |
| 47 | 4.8 | 4.4 | 5   | 21 | 10 | 3 | 5 | 3 | 2 | 2 | 1 | 2 |
| 39 | 3   | 3   | 3.2 | 19 | 9  | 2 | 3 | 2 | 3 | 1 | 1 | 2 |

|    |     |     |     |    |    |   |   |   |   |   |   |   |
|----|-----|-----|-----|----|----|---|---|---|---|---|---|---|
| 41 | 3.2 | 3.8 | 3.8 | 12 | 5  | 3 | 5 | 3 | 3 | 1 | 1 | 1 |
| 30 | 4.6 | 4.4 | 4.8 | 61 | 10 | 1 | 0 | 1 | 4 | 0 | 1 | 0 |
| 30 | 2.8 | 4.6 | 3.8 | 16 | 7  | 3 | 4 | 2 | 4 | 2 | 1 | 2 |
| 45 | 3.8 | 4.4 | 4.4 | 24 | 6  | 2 | 5 | 2 | 3 | 0 | 2 | 2 |
| 45 | 4.8 | 4.8 | 4.6 | 38 | 10 | 2 | 5 | 2 | 3 | 2 | 1 | 2 |
| 44 | 3.8 | 4.6 | 4.2 | 23 | 8  | 3 | 5 | 3 | 4 | 2 | 1 | 2 |
| 33 | 3.8 | 4.4 | 4.6 | 27 | 10 | 3 | 3 | 2 | 2 | 1 | 1 | 2 |
| 34 | 4.2 | 4.4 | 4.4 | 23 | 10 | 4 | 5 | 4 | 2 | 0 | 1 | 1 |
| 19 | 2.2 | 4   | 3.8 | 24 | 6  | 2 | 3 | 2 | 0 | 0 | 1 | 2 |
| 38 | 3.6 | 4.2 | 3.8 | 19 | 5  | 2 | 5 | 2 | 3 | 0 | 1 | 0 |
| 44 | 4   | 4.4 | 5   | 18 | 4  | 2 | 4 | 3 | 2 | 1 | 1 | 3 |
| 34 | 2.6 | 4.4 | 4.4 | 23 | 7  |   |   |   | 2 |   |   |   |
| 39 | 4.4 | 3.6 | 4.2 | 10 | 6  |   | 1 | 1 | 2 | 0 | 1 |   |
| 42 | 4   | 3.6 | 3.8 | 18 | 7  | 4 | 5 | 3 | 3 | 1 | 1 | 3 |
| 43 | 4.6 | 4.6 | 4.4 | 14 | 7  | 2 | 4 | 2 | 2 | 1 | 1 | 2 |
| 45 | 3.4 | 4.4 | 4.6 | 18 | 6  | 2 | 3 | 2 | 3 | 1 | 1 | 0 |
| 34 | 4.8 | 4.2 | 4   | 25 | 8  | 2 | 3 | 1 | 1 | 0 | 1 | 1 |
| 18 | 2.4 | 4   | 3.6 | 15 | 5  | 2 | 3 | 1 | 1 | 0 | 1 | 2 |
| 28 | 3.2 | 3.8 | 3.4 | 18 | 7  | 3 | 5 | 4 | 2 | 2 | 1 | 0 |
| 44 | 4   | 4.2 | 3.8 | 23 | 9  | 3 | 4 | 2 | 3 | 1 | 1 | 2 |
| 44 | 4.6 | 4.6 | 4.2 | 37 | 11 | 3 |   | 4 | 3 | 2 | 1 | 1 |
| 45 | 3.8 | 3.6 | 4.4 | 20 | 6  | 1 | 4 | 3 | 2 | 1 | 1 | 3 |
| 38 | 4   | 4.4 | 5   | 19 | 8  | 2 | 2 | 2 | 2 | 1 | 1 | 0 |
| 42 | 4   | 4.6 | 4.6 | 27 | 9  | 3 | 4 | 3 | 3 | 1 | 1 | 2 |
| 45 | 4.4 | 4.2 | 4.2 | 44 | 9  |   |   |   | 3 | 0 | 1 |   |
| 33 | 4   | 3.8 | 4   | 17 | 4  | 1 | 4 | 4 | 4 | 1 | 1 | 1 |
| 48 | 3.6 | 4   | 3.2 | 22 | 8  | 1 | 3 | 2 | 2 | 1 | 1 | 2 |
| 38 | 4   | 3.8 | 4.2 | 19 | 6  | 2 | 4 | 2 | 2 | 1 | 1 | 3 |
| 46 | 4   | 4   | 4   | 20 | 6  | 1 | 5 | 2 | 3 | 1 | 1 | 2 |
| 28 | 4.2 | 5   | 4.6 | 28 | 7  | 4 | 4 | 3 | 2 | 1 | 1 | 0 |
| 36 | 3.6 | 3.8 | 3.4 | 14 | 5  | 3 | 4 | 3 | 2 | 1 | 1 | 2 |
| 45 | 3.8 | 4.6 | 4.6 | 27 | 5  | 2 | 4 | 3 | 2 | 1 | 1 | 2 |
| 46 | 3.8 | 4.8 | 4.4 | 25 | 6  | 3 | 5 | 5 | 3 | 0 | 1 | 2 |
| 41 | 4   | 4.4 | 4.6 | 41 | 8  | 3 | 5 | 4 | 3 | 1 | 1 | 1 |
| 28 | 4   | 4   | 3.2 | 28 | 5  | 3 | 3 | 3 | 2 | 0 | 3 | 1 |
| 34 | 3.6 | 3.6 | 3.6 | 26 | 5  | 3 | 4 | 3 | 2 | 2 | 2 | 1 |
| 34 | 3.6 | 3.6 | 4.2 | 21 | 7  | 3 | 4 | 3 | 2 | 1 | 3 | 3 |
| 32 | 3.4 | 3.8 | 5   | 21 | 8  | 3 | 5 | 3 | 2 | 0 | 1 | 2 |
| 39 | 3.8 | 4   | 4.6 | 37 | 6  | 4 | 5 | 3 | 3 | 2 | 1 | 1 |
| 30 | 3.8 | 3.6 | 3.4 | 13 | 4  | 2 | 5 | 2 | 2 | 2 | 1 | 2 |
| 36 | 3.6 | 4.4 | 3.8 | 8  | 5  |   |   |   | 2 |   |   |   |
| 21 | 4   | 3.8 | 3   | 15 | 5  | 2 | 4 | 3 | 2 | 1 | 3 | 3 |
| 43 | 3.6 | 4.6 | 4.8 | 32 | 7  | 2 | 4 | 3 | 4 | 1 | 1 | 2 |
| 30 | 3.8 | 4   | 3.8 | 19 | 7  | 2 | 4 | 2 | 2 | 1 | 3 | 2 |
| 32 | 3.6 | 4.2 | 4   | 37 | 9  | 2 | 3 | 2 | 3 | 1 | 1 | 0 |
| 44 | 3.6 | 4   | 4.2 | 38 | 8  | 2 | 5 | 2 | 2 | 1 | 1 | 1 |
| 43 | 3.4 | 4.2 | 4.4 | 28 | 8  | 3 | 5 | 3 | 3 | 1 | 1 | 2 |
| 26 | 2.6 | 4   | 3.6 | 15 | 7  | 4 | 3 | 4 | 3 | 1 | 1 | 1 |
| 41 | 3.6 | 4   | 3.8 | 20 | 6  | 2 | 3 | 3 | 3 | 1 | 1 | 2 |

|    |     |     |     |    |   |   |   |   |   |   |   |   |
|----|-----|-----|-----|----|---|---|---|---|---|---|---|---|
| 33 | 3.2 | 3.6 | 3.2 | 17 | 6 | 3 | 4 | 3 | 2 | 1 | 1 | 3 |
| 40 | 2.8 | 3.6 | 3.8 | 21 | 4 | 3 | 5 | 3 | 4 | 0 | 1 | 2 |
| 42 | 4.4 | 3.6 | 4   | 22 | 4 | 3 | 5 | 3 | 4 | 4 | 3 | 4 |
| 35 | 3.6 | 4.4 | 3.8 | 18 | 7 | 3 | 4 | 3 | 2 | 0 | 1 | 0 |
| 35 | 3.6 | 4   | 4   | 25 | 8 | 2 | 4 | 2 | 3 | 1 | 1 | 2 |
| 36 | 2.8 | 4.6 | 4   | 16 | 7 | 3 | 4 | 4 | 3 | 2 | 1 | 3 |
| 27 | 3.4 | 3.4 | 4   | 7  | 4 | 2 | 5 | 4 | 2 | 2 | 1 | 1 |
| 44 | 3.6 | 4.6 | 4.2 | 9  | 4 | 1 | 5 | 2 | 2 | 1 | 1 | 3 |
| 49 | 3.2 | 3.8 | 4.4 | 25 | 7 | 2 | 5 | 2 | 3 | 1 | 1 | 0 |

| HEARD<br>ALPHA | ALPHA<br>IDENTITY 1 | ALPHA<br>IDENTITY 2 |
|----------------|---------------------|---------------------|
| 2              | 2                   | 3                   |
| 2              | 2                   | 1                   |
| 2              | 2                   | 3                   |
| 2              | 2                   | 3                   |
| 2              | 2                   | 2                   |
| 2              | 2                   | 2                   |
| 2              | 2                   | 3                   |
| 2              | 1                   | 1                   |
| 2              | 2                   | 3                   |
| 2              | 2                   | 2                   |
| 1              | 2                   | 3                   |
| 2              | 2                   | 3                   |
| 2              | 2                   | 3                   |
| 2              | 2                   | 3                   |
| 1              | 1                   | 2                   |
| 1              | 2                   | 3                   |
| 2              | 1                   | 3                   |
| 2              | 1                   | 3                   |
| 2              | 1                   | 3                   |
| 1              | 1                   | 2                   |
| 2              | 2                   | 2                   |
| 2              | 1                   | 2                   |
| 1              | 2                   | 3                   |
| 2              | 2                   | 3                   |
| 1              | 1                   | 1                   |
| 2              | 1                   | 2                   |
| 2              | 2                   | 3                   |
| 2              | 2                   | 3                   |
| 2              | 1                   | 3                   |
| 2              | 1                   | 1                   |
| 2              | 1                   | 3                   |
| 2              | 2                   | 2                   |
| 2              | 2                   | 3                   |
| 2              | 2                   | 3                   |
| 1              | 2                   | 3                   |
| 2              | 2                   | 3                   |
| 1              | 1                   | 3                   |
| 2              | 2                   | 2                   |
| 1              | 2                   | 3                   |
| 1              | 1                   | 2                   |
| 2              | 2                   | 1                   |
| 1              | 1                   | 2                   |
| 2              | 2                   | 3                   |
| 2              | 1                   | 1                   |
| 2              | 2                   | 2                   |
| 2              | 2                   | 2                   |

|   |   |   |
|---|---|---|
| 2 | 2 | 2 |
| 2 | 2 | 2 |
| 2 | 2 | 3 |
| 2 | 2 | 3 |
| 1 | 2 | 2 |
| 2 | 1 | 2 |
| 2 | 2 | 3 |
| 1 | 1 | 3 |
| 2 | 1 | 1 |
| 2 | 1 | 2 |
| 2 | 2 | 3 |
| 2 | 2 | 2 |
| 1 | 1 | 1 |
| 2 | 2 | 3 |
| 2 | 2 | 3 |
| 2 | 2 | 3 |
| 2 | 2 | 2 |
| 2 | 2 | 3 |
| 2 | 2 | 2 |
| 2 | 2 | 2 |
| 2 | 1 | 2 |
| 2 | 2 | 2 |
| 2 | 2 | 3 |
| 2 | 2 | 3 |
| 2 | 1 | 2 |
| 2 | 1 | 1 |
| 2 | 2 | 3 |
| 2 | 2 | 2 |
| 1 | 2 | 3 |
| 2 | 1 | 2 |
| 2 | 1 | 2 |
| 2 | 1 | 2 |
| 2 | 2 | 3 |
| 2 | 2 | 2 |
| 2 | 2 | 2 |
| 1 | 1 | 2 |
| 1 | 2 | 3 |
| 2 | 1 | 2 |
| 2 | 2 | 1 |
| 2 | 2 | 3 |
| 2 | 1 | 3 |
| 2 | 2 | 3 |
| 2 | 2 | 3 |
| 2 | 2 | 3 |
| 2 | 1 | 2 |
| 2 | 2 | 3 |
| 2 | 2 | 3 |
| 2 | 1 | 3 |
| 2 | 2 | 2 |

|   |   |   |
|---|---|---|
| 2 | 2 | 2 |
| 2 | 2 | 3 |
| 2 | 1 | 2 |
| 2 | 2 | 3 |
| 2 | 2 | 3 |
| 2 | 2 | 3 |
| 2 | 2 | 3 |
| 2 | 1 | 2 |
| 2 | 2 | 3 |
| 2 | 2 | 3 |
| 2 | 2 | 3 |
| 2 | 2 | 3 |
| 1 | 1 | 3 |
| 2 | 2 | 3 |
| 1 | 1 | 1 |
| 2 | 2 | 3 |
| 2 | 2 | 3 |
| 1 | 2 | 2 |
| 2 | 2 | 2 |
| 2 | 2 | 2 |
| 2 | 1 | 2 |
| 2 | 2 | 2 |
| 2 | 2 | 3 |
| 2 | 1 | 2 |
| 1 | 2 | 3 |
| 1 | 1 | 3 |
| 2 | 1 | 1 |
| 1 | 2 | 2 |
| 2 | 2 | 3 |
| 2 | 1 | 1 |
| 2 | 2 | 3 |
| 2 | 2 | 2 |
| 2 | 2 | 3 |
| 2 | 2 | 3 |
| 2 | 2 | 3 |
| 2 | 2 | 3 |
| 2 | 2 | 3 |
| 2 | 2 | 3 |
| 1 | 1 | 2 |
| 1 | 1 | 1 |
| 2 | 2 | 2 |
| 2 | 1 | 2 |
| 2 | 2 | 2 |
| 2 | 2 | 2 |
| 2 | 1 | 2 |
| 1 | 2 | 2 |
| 2 | 1 | 2 |
| 2 | 2 | 3 |
| 2 | 2 | 2 |
| 2 | 2 | 3 |

|   |   |   |
|---|---|---|
| 1 | 1 | 1 |
| 2 | 2 | 3 |
| 2 | 2 | 2 |
| 2 | 2 | 2 |
| 2 | 2 | 3 |
| 1 | 1 | 1 |
| 2 | 2 | 3 |
| 2 | 2 | 3 |
| 2 | 2 | 3 |
| 2 | 2 | 2 |
| 2 | 2 | 2 |
| 2 | 2 | 3 |
| 2 | 2 | 3 |
| 2 | 2 | 2 |
| 2 | 2 | 2 |
| 2 | 2 | 3 |
| 2 | 2 | 2 |
| 2 | 2 | 3 |
| 1 | 2 | 3 |
| 2 | 1 | 3 |
| 2 | 2 | 2 |
| 2 | 2 | 2 |
| 2 | 2 | 3 |
| 2 | 2 | 3 |
| 1 | 2 | 3 |
| 2 | 2 | 3 |
| 2 | 1 | 3 |
| 2 | 2 | 2 |
| 1 | 1 | 3 |
| 2 | 2 | 3 |
| 2 | 2 | 3 |
| 2 | 2 | 3 |
| 2 | 2 | 3 |
| 2 | 2 | 3 |
| 2 | 2 | 2 |
| 1 | 1 | 1 |
| 2 | 1 | 2 |
| 2 | 1 | 2 |
| 2 | 2 | 3 |
| 2 | 1 | 2 |
| 2 | 2 | 1 |
| 2 | 1 | 2 |
| 2 | 2 | 2 |
| 2 | 2 | 3 |
| 2 | 1 | 2 |
| 2 | 1 | 1 |

|   |   |   |
|---|---|---|
| 2 | 1 | 3 |
| 2 | 2 | 3 |
| 2 | 2 | 3 |
| 2 | 2 | 2 |
| 2 | 2 | 3 |
| 2 | 2 | 3 |
| 2 | 2 | 3 |
| 2 | 2 | 2 |
| 2 | 2 | 3 |
| 2 | 2 | 3 |
| 2 | 2 | 2 |
| 2 | 1 | 2 |
| 2 | 2 | 2 |
| 2 | 1 | 2 |
| 2 | 1 | 2 |
| 2 | 1 | 3 |
| 2 | 2 | 3 |
| 2 | 2 | 3 |
| 2 | 2 | 3 |
| 2 | 2 | 3 |
| 2 | 2 | 3 |
| 1 | 1 | 2 |
| 2 | 1 | 3 |
| 2 | 2 | 3 |
| 1 | 1 | 2 |
| 2 | 2 | 3 |
| 2 | 2 | 3 |
| 2 | 1 | 1 |
| 2 | 2 | 2 |
| 2 | 1 | 2 |
| 2 | 1 | 2 |
| 2 | 2 | 3 |
| 2 | 2 | 3 |
| 2 | 2 | 2 |
| 1 | 1 | 3 |
| 2 | 2 | 2 |
| 2 | 2 | 3 |
| 2 | 2 | 3 |
| 2 | 2 | 3 |
| 2 | 2 | 3 |
| 1 | 2 | 3 |
| 2 | 1 | 3 |
| 2 | 1 | 1 |
| 2 | 2 | 3 |
| 2 | 2 | 3 |
| 2 | 2 | 3 |
| 2 | 1 | 2 |
| 2 | 1 | 2 |
| 2 | 1 | 2 |

|   |   |   |
|---|---|---|
| 2 | 2 | 2 |
| 2 | 2 | 2 |
| 2 | 2 | 2 |
| 2 | 1 | 3 |
| 2 | 2 | 3 |
| 2 | 2 | 3 |
| 2 | 1 | 2 |
| 1 | 2 | 3 |
| 2 | 2 | 3 |
| 2 | 1 | 2 |
| 2 | 2 | 2 |
| 2 | 2 | 2 |
| 2 | 1 | 3 |
| 2 | 2 | 2 |
| 1 | 2 | 3 |
| 2 | 2 | 3 |
| 2 | 2 | 3 |
| 2 | 2 | 3 |
| 2 | 2 | 3 |
| 2 | 1 | 3 |
| 2 | 2 | 2 |
| 2 | 2 | 3 |
| 2 | 2 | 2 |
| 2 | 2 | 3 |
| 2 | 2 | 2 |
| 2 | 2 | 1 |
| 2 | 2 | 3 |
| 2 | 2 | 1 |
| 2 | 2 | 3 |
| 2 | 2 | 1 |
| 2 | 2 | 3 |
| 2 | 2 | 3 |
| 1 | 2 | 3 |
| 1 | 2 | 3 |
| 2 | 2 | 3 |
| 2 | 2 | 2 |
| 2 | 2 | 3 |
| 2 | 2 | 2 |
| 2 | 2 | 3 |
| 2 | 2 | 3 |
| 2 | 1 | 3 |
| 2 | 2 | 2 |
| 2 | 1 | 2 |
| 2 | 2 | 3 |
| 2 | 1 | 1 |
| 2 | 2 | 3 |
| 2 | 2 | 3 |
| 1 | 1 | 2 |
| 2 | 2 | 2 |

|   |   |   |
|---|---|---|
| 2 | 2 | 3 |
| 2 | 2 | 3 |
| 2 | 2 | 3 |
| 2 | 2 | 2 |
| 2 | 1 | 2 |
| 2 | 1 | 2 |
| 2 | 1 | 2 |
| 2 | 1 | 2 |
| 2 | 2 | 3 |
| 2 | 2 | 2 |
| 2 | 2 | 3 |
| 2 | 2 | 3 |
| 2 | 2 | 3 |
| 2 | 2 | 2 |
| 2 | 2 | 3 |
| 1 | 2 | 2 |
| 1 | 2 | 1 |
| 2 | 2 | 3 |
| 2 | 2 | 2 |
| 2 | 2 | 3 |
| 2 | 2 | 1 |
| 1 | 1 | 3 |
| 2 | 1 | 3 |
| 1 | 1 | 2 |
| 2 | 2 | 3 |
| 2 | 1 | 2 |
| 1 | 2 | 3 |
| 2 | 2 | 3 |
| 1 | 2 | 3 |
| 2 | 1 | 2 |
| 2 | 2 | 3 |
| 2 | 1 | 2 |
| 2 | 2 | 2 |
| 2 | 2 | 2 |
| 2 | 2 | 3 |
| 2 | 1 | 2 |
| 2 | 2 | 3 |
| 2 | 2 | 3 |
| 2 | 2 | 3 |
| 2 | 2 | 2 |
| 2 | 2 | 2 |
| 1 | 2 | 2 |
| 2 | 2 | 2 |
| 2 | 2 | 3 |
| 2 | 1 | 2 |
| 2 | 1 | 2 |
| 2 | 2 | 3 |
| 2 | 2 | 2 |
| 2 | 2 | 3 |

|   |   |   |
|---|---|---|
| 1 | 2 | 3 |
| 1 | 1 | 2 |
| 2 | 2 | 2 |
| 1 | 2 | 3 |
| 2 | 2 | 3 |
| 2 | 1 | 2 |
| 2 | 2 | 3 |
| 2 | 2 | 3 |
| 1 | 1 | 1 |
| 2 | 2 | 3 |
| 2 | 2 | 2 |
| 2 | 2 | 2 |
| 2 | 1 | 2 |
| 2 | 1 | 2 |
| 2 | 2 | 2 |
| 1 | 1 | 1 |
| 2 | 2 | 3 |
| 2 | 2 | 3 |
| 1 | 2 | 3 |
| 2 | 2 | 3 |
| 2 | 2 | 3 |
| 2 | 2 | 3 |
| 1 | 1 | 3 |
| 2 | 2 | 2 |
| 2 | 2 | 3 |
| 2 | 1 | 2 |
| 2 | 2 | 3 |
| 2 | 1 | 2 |
| 2 | 1 | 1 |
| 2 | 2 | 2 |
| 2 | 2 | 3 |
| 2 | 2 | 3 |
| 2 | 2 | 3 |
| 1 | 2 | 3 |
| 1 | 1 | 3 |
| 2 | 1 | 1 |
| 2 | 2 | 2 |
| 2 | 1 | 2 |
| 2 | 1 | 2 |
| 2 | 2 | 3 |
| 2 | 2 | 1 |
| 2 | 2 | 3 |
| 2 | 2 | 2 |
| 2 | 2 | 3 |
| 1 | 2 | 3 |
| 2 | 2 | 3 |
| 1 | 1 | 2 |
| 2 | 2 | 2 |
| 2 | 1 | 1 |

|   |   |   |
|---|---|---|
| 1 | 2 | 2 |
| 2 | 2 | 3 |
| 2 | 1 | 1 |
| 2 | 1 | 2 |
| 2 | 1 | 2 |
| 2 | 2 | 3 |
| 2 | 2 | 2 |
| 2 | 2 | 2 |
| 1 | 1 | 3 |
